# Supplementary material for: Histone Deacetylase 7 mediates tissue-specific autoimmunity via control of innate effector function in invariant Natural Killer T Cells
Source: eLife journal article supplement (doi:10.7554/elife.32109), 2018-04-16

A

| Gene Name | Average Activation/Inhibition Score | Average log2 FDE Va14DP/Va14 | Average (-log P) |
|-----------|-------------------------------------|------------------------------|------------------|
| ICOS      | -2.21                               | -2.326                       | 5.63             |
| IL4       | -1.88                               | -2.316                       | 10.49            |
| ZBTB16    | -2.21                               | -1.600                       | 6.19             |
| IFNG      | -2.83                               | -1.514                       | 5.22             |
| IL21      | -1.95                               | -1.089                       | 10.55            |
| GATA3     | -2.29                               | -0.826                       | 6.00             |
| ITK       | -2.82                               | -0.721                       | 16.78            |
| IL2       | -3.49                               | -0.323                       | 10.91            |
| TNF       | -3.18                               | -0.143                       | 6.06             |
| TGFB1     | -1.57                               | 0.120                        | 9.15             |
| STAT5A    | -1.10                               | 0.304                        | 8.83             |
| IL15      | -3.05                               | 1.152                        | 8.47             |
| IL18      | -2.75                               | 1.271                        | 5.85             |
| TBX21     | -0.16                               | -2.320                       | 7.61             |
| Klra7     | -0.25                               | -1.795                       | 4.48             |
| CREBBF    | 0.20                                | -0.355                       | 6.92             |
| RUNX1     | 0.39                                | -0.241                       | 6.92             |
| STAT3     | -0.64                               | 0.103                        | 6.65             |
| Tcf7      | 0.59                                | 0.388                        | 4.40             |
| FOXP3     | 0.16                                | 0.973                        | 8.31             |
| TIGIT     | -0.58                               | 2.485                        | 5.67             |
| ID2       | 1.69                                | -2.518                       | 12.63            |
| CD28      | 3.03                                | -0.783                       | 9.16             |
| BACH2     | 1.61                                | 0.169                        | 5.74             |
| ID3       | 2.02                                | 0.250                        | 12.36            |
| CTLA4     | 1.93                                | 2.206                        | 5.88             |

B

| Ingenuity Canonical Pathway                                 | -log P Thymus | -log P Spleen | No. of Genes |
|-------------------------------------------------------------|---------------|---------------|--------------|
| T Helper Cell Differentiation                               | 3.19          | 6.62          | 8            |
| Crosstalk between Dendritic Cells and Natural Killer Cells  | NS            | 2.68          | 4            |
| Role of Cytokines in Immune Cell Communication              | NS            | 2.37          | 3            |
| Hematopoiesis from Pluripotent/Multipotent Stem Cells       | 2.23          | NS            | 3            |
| PTEN Signaling                                              | 2.22          | NS            | 5            |
| Protein Kinase A Signaling                                  | NS            | 2.04          | 7            |
| Hepatic Fibrosis and Hepatic Stellate Cell Activation       | 4.89          | 2.29          | 10           |
| Pattern Recognition Receptors in Recognition of Pathogens   | 2.85          | 3.01          | 8            |
| Altered T-Cell and B-Cell Signaling in Rheumatoid Arthritis | 2.77          | 1.79          | 6            |
| Nitric Oxide Signaling in the Cardiovascular System         | NS            | 2.50          | 5            |
| Autoimmune Thyroid Disease Signaling                        | 1.97          | 1.48          | 3            |
| Osteoblasts/clasts and Chondrocytes in Rheumatoid Arthritis | NS            | 1.97          | 7            |
| Hepatic Cholestasis                                         | 1.68          | 1.78          | 7            |
| Allograft Rejection Signaling                               | 1.31          | 1.84          | 4            |
| Glutamate Receptor Signaling                                | NS            | 2.30          | 3            |
| Stearate Biosynthesis I (Animals)                           | NS            | 2.88          | 3            |
| PPAR Signaling                                              | 1.89          | NS            | 4            |

C

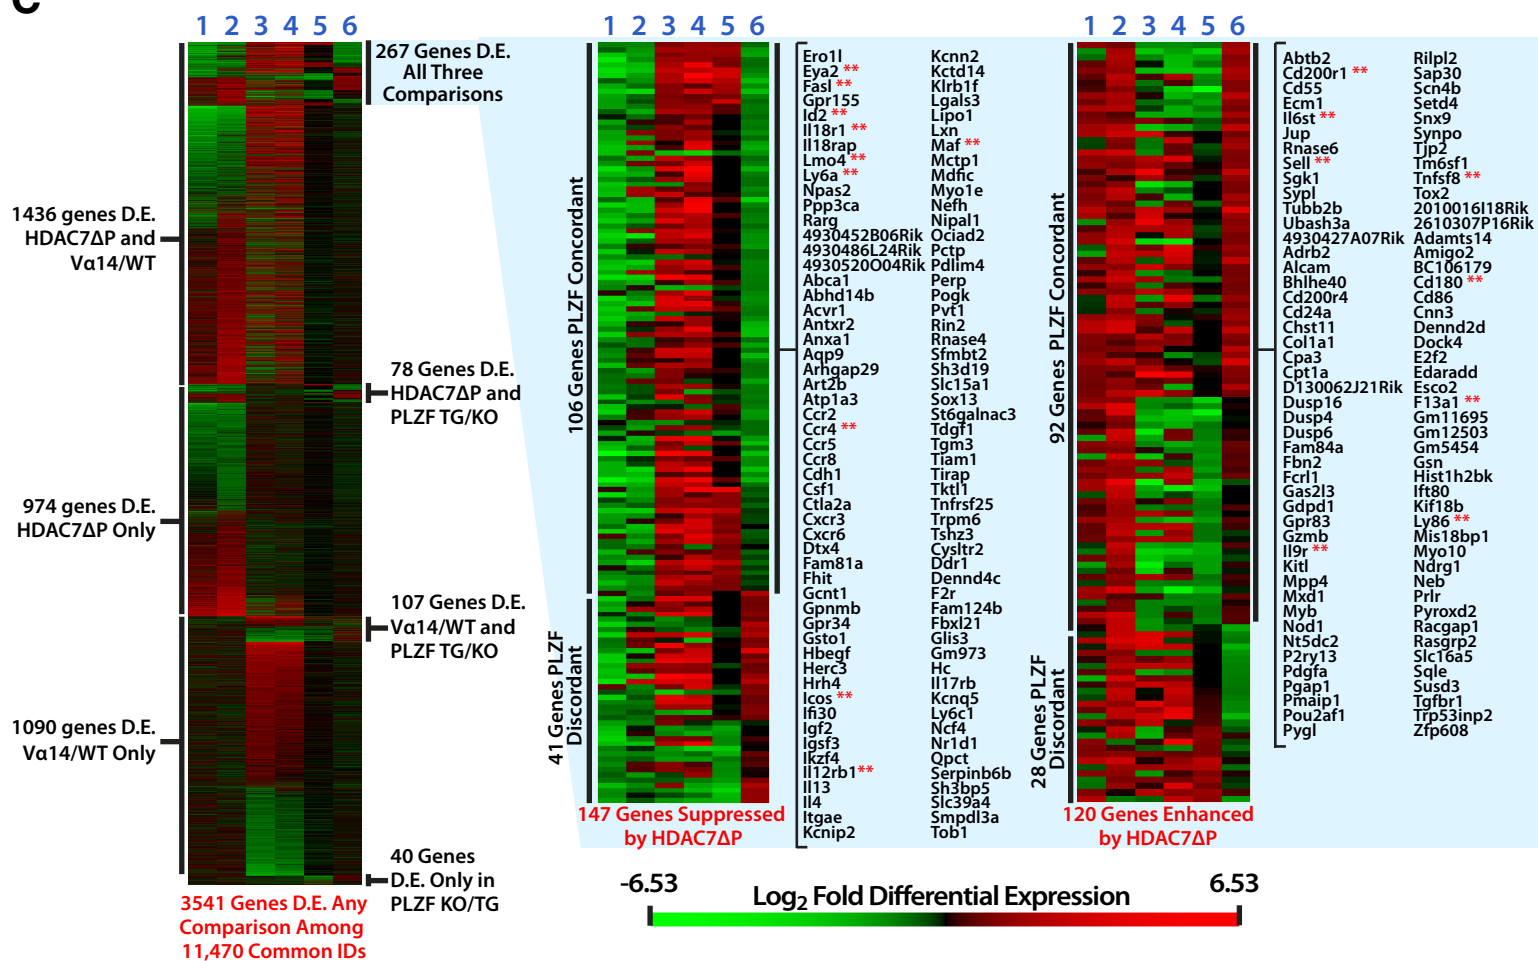

Supplement: supp [file elife-32109-supp-v1.zip]
