# Supplementary material for: Histone Deacetylase 7 mediates tissue-specific autoimmunity via control of innate effector function in invariant Natural Killer T Cells
Source: eLife. 2018 Apr 17;7:e32109. doi: 10.7554/eLife.32109 (PMC5943034; doi:10.7554/eLife.32109)
Supplement: Figure 1—source data 1. — Figure 1D, Figure 1—figure supplement 1C, and Figure 1—figure supplement 2A–B. [file elife-32109-fig1-data1.xlsx]

## Sheet: Fig. 1D Values
Four sets of paired littermates
% cells recovered deltaP/ cells recovered WT:
	Total iNKT	CD24 HI	S1	S2	S3
dP911/WT910	3.54271	148.837	6.83761	3.43511	1.54173
dP942/WT943	5.55286	72.381	0.424328	2.67579	4.81928
dP944/WT947	3.90409	38.5965	0.353357	2.67534	3.58079
dP946/WT948	7.40439	83.1169	0.749064	3.35938	8.93522
MEAN	5.10101	85.7329	2.09109	3.03641	4.71925
STDEV	1.76736	46.1487	0.99	0.417806	3.11861
Total number of cells recovered:
Mouse	Live cells	Total iNKT	CD24 HI	S1	S2	S3
910 enriched	79670	3980	43	117	524	1881
943 enriched	62977	4124	105	707	1607	1577
947 enriched	27872	3253	57	566	1383	1145
948 enriched	58374	3687	77	534	1280	1343
911 enriched	95486	141	64	8	18	29
942 enriched	36584	229	76	3	43	76
944 enriched	20472	127	22	2	37	41
946 enriched	40304	273	64	4	43	120
	T-test	1.73456e-06	0.464383	0.00947431	0.00258012	0.000112698

## Sheet: Fig. 1, S1C Values
Sample	% of live cells ==>	tetramer pos	cd24 hi	S1	S2	S3	empty/ loaded HDAC7dP	Sample	tetramer pos	cd24 hi	S1	S2	S3
910 loaded		0.376428	0.00109929	0.00832319	0.0383181	0.327431		911	0.36319	0.406697	0.43381	0	0.289207
943 loaded		0.143418	0.00112485	0.0286837	0.0532054	0.0573674		942	0.569089	0.497953	0	0.398362	0
947 loaded		0.136295	0.00210195	0.0292061	0.0495618	0.0526594		944	0.361241	0.535486	0	0	0.337158
948 loaded		0.139889	0.00211954	0.0291158	0.0514267	0.0549964		946	0.162736	0.247802	0.198242	0.0991209	0
wt62514 loaded		0.341233	0.00135607	0.00623793	0.0477337	0.28586		dP 62514	0.163743	0.982457	0.254711	0.0498348	0.0818714
								mean %	32.4	42.1985	17.7353	10.9464	14.1647
911 loaded		0.00735439	0.00273652	0.000513097	0.000342065	0.00307858		STDEV%	16.9322	12.8098	18.3779	16.6651	16.1012
942 loaded		0.00400123	0.00182914	0	0.000571605	0.000571605		t-test	0.000790368	0.0399725	0.0860735	0.00265193	0.044873
944 loaded		0.00469226	0.00189925	0.000223441	0.00122892	0.000335161
946 loaded		0.00765127	0.00228396	0.00057099	0.00114198	0.00137038
dP 62514 loaded		0.00567705	0.00037847	0.000973208	0.00124354	0.00227082
							HDAC7 dP/ WT Loaded	Sample	tetramer pos	cd24 hi	S1	S2	S3
910 empty		0.00354046	0.00159892	0.000342625	0	0.000456834		911/910	0.0195373	2.48935	0.0616466	0.00892697	0.00940222
943 empty		0.00180018	0.000675067	0.000225022	0.000112511	0.000225022		942/943	0.027899	1.62611	0	0.0107434	0.00996394
947 empty		0.00147152	0.000565971	0.000113194	0.000226388	0.000113194		944/947	0.0344272	0.903563	0.00765049	0.0247958	0.00636469
948 empty		0.00165035	0.000707294	0.000117882	0.000235765	0.000353647		946/948	0.0546951	1.07757	0.019611	0.022206	0.0249176
wt62514 empty		0.000868107	0.000115748	0.000115748	5.78738e-05	0.000462991		62514	0.0166369	0.279093	0.156015	0.0260517	0.00794382
								mean %	3.06391	127.514	4.89846	1.85448	1.17184
911 empty		0.00267104	0.00111293	0.000222587	0	0.000890347		STDEV%	1.51646	71.3341	2.7491	0.79949	0.832186
942 empty		0.00227706	0.000910824	0	0.000227706	0		t-test	0.0034004	0.578344	0.00584881	8.93941e-08	0.0377387
944 empty		0.00169503	0.00101702	0	0	0.000113002
946 empty		0.00124514	0.000565971	0.000113194	0.000113194	0
dP 62514 empty		0.000929575	0.00037183	0.000247887	6.19717e-05	0.000185915

## Sheet: Fig. 1, S2A Values
	Log2 %HDAC7-dP/ %WT
Population	dPC1	dPC2	dPC3	dPC4	dPC5	Average	STDEV
DN1-4	0	0	0	0	0	0	0
TCR+	0.547193	0.00656739	-0.276389	0.11477	0.0979199	0.0980123	0.29605
CD8 ISP	-1.54087	-1.11371	-2.64296	-2.54059	-1.98592	-1.96481	0.651144
DP	-0.140957	-0.429251	-0.201586	-0.918779	0.269264	-0.284262	0.435143
CD4 SP	0.14485	-1.19929	1.33924	-0.548281	1.25763	0.198829	1.11102
CD8 SP	0.927782	-0.40546	0.359521	0.2439	1.02752	0.430652	0.579312

## Sheet: Fig. 1, S2B Values
WT-derived (CD45.1) % of parent poulation
Population	dPC1	dPC2	dPC3	dPC4	dPC5	Average	STDEV
CD4 Naive	85.2	77.5	83.5	73.6	76.3	79.22	4.92818
CD4 Memory	13.5	16.4	15.4	21.5	21.8	17.72	3.73724
CD8 Naive	39.7	62	64.7	53	64.2	56.72	10.6187
CD8 TCM	12.7	21.2	20.1	16.4	21.5	18.38	3.76922
CD8 TEM	46.1	10.9	13.3	29.5	12.5	22.46	15.2082
HDAC7-dP derived (CD45.2) % of parent poulation
Population	dPC1	dPC2	dPC3	dPC4	dPC5	Average	STDEV
CD4 Naive	65.8	77.8	76.6	76.7	71.7	73.72	5.01568
CD4 Memory	32.3	19.2	21.9	18.4	25.9	23.54	5.7064
CD8 Naive	48.4	74.6	77.7	82.9	82.8	73.28	14.3481
CD8 TCM	9.87	7.49	3.74	4.66	3.68	5.888	2.712
CD8 TEM	39.5	14.5	17.7	15.5	13	20.04	11.0117
