# Supplementary material for: Histone Deacetylase 7 mediates tissue-specific autoimmunity via control of innate effector function in invariant Natural Killer T Cells
Source: eLife. 2018 Apr 17;7:e32109. doi: 10.7554/eLife.32109 (PMC5943034; doi:10.7554/eLife.32109)
Supplement: Figure 2—source data 1. — Figure 2E, Figure 2G–H, Figure 2—figure supplement 1B–C, and Figure 2—figure supplement 2A,C. [file elife-32109-fig2-data1.xlsx]

## Sheet: Fig. 2E Values
	WT (45.1)				7KO (45.2)
Animal	Naïve	TCM	TEM		Naïve	TCM	TEM
141030 1	78	14	5.9		28	34	30
141030 2	73	19	6.8		9	60	25
141030 3	69	23	6.3		14	51	28
140926 1	78	13	7.8		28	42	25
140926 2	74	17	7.3		20	44	27
141022 1	68	21	7		18	54	25
141022 2	67	22	7.9		22	47	28
151202 1	81	15	4		16	77	6.8
151202 2	69	15	15		12	73	13
151216 1	68	26	1.8		23	68	9
151216 2	73	22	5		19	74	7
151216 3	73	22	5		14	78	8
Mean	72.5833	19.0833	6.65		18.5833	58.5	19.3167
STDEV	4.58175	4.18783	3.16012		5.99179	15.2465	9.55195

## Sheet: Fig. 2G-H Values
	WT			7KO
Animal	CD8 % IFNg+	MFI		CD8 % IFNg+	MFI
141030 1	13	2072		50	3878
141030 2	16	2140		57	3769
141030 3	14	2013		40	3157
151216 1	28	2088		71	5122
151216 2	25	2018		83	5295
151216 3	30	2255		90	5787
mean	21	2097.67		65.1667	4501.33
STDEV	7.53658	90.3475		19.4876	1039.25

## Sheet: Fig. 2, S1B Values
Eomes pos, as % of Mature CD8 SP
WT animal	%Eomes+		KO Animal	%Eomes+
151027 WT1	1.03		151027 KO1	5.06
151027 WT2	1.28		151027 KO2	5.66
160427 WT1	0.83		160427 KO1	5.75
160427 WT2	1.21		160427 KO2	6.7
160430 WT1	1.66		160430 KO1	9.61
160430 WT2	0.62		160430 KO2	8.83
160402 WT1	1.79		160402 KO 1	7.19
Average	1.20286			6.97143
STDEV	0.421968			1.70309

## Sheet: Fig. 2, S1C Values
WT	gd/ vg63					PLZF
Sample	total live cells	#gd	# vg63	%gd	% vg63	total live cells	#gd	#plzf	%gd	% plzf
801	231470	576	56	0.248844	0.0241932	239450	626	76	0.261432	0.0317394
933	223704	425	72	0.189983	0.0321854	441876	1149	132	0.260028	0.0298726
934	441857	908	58	0.205496	0.0131264	452622	1383	135	0.305553	0.0298262
935	436147	965	101	0.221256	0.0231573	444407	1312	198	0.295225	0.0445538
939	220564	533	50	0.241653	0.0226692	446880	1554	154	0.347744	0.0344612
804	234911	456	53	0.194116	0.0225617	217416	445	50	0.204677	0.0229974
mean	298109	643.833	65	0.216891	0.0229822	373775	1078.17	124.167	0.27911	0.0322418
stdev	109272	233.661	19.2042	0.0246	0.00605982	112853	443.71	53.5553	0.0487576	0.00712277
Hdac7-KO	gd/vg63					PLZF
Sample	total live cells	#gd	# vg63	%gd	% vg63	total live cells	#gd	#plzf	%gd	% plzf
942	284003	1031	119	0.363024	0.041901	267740	1259	134	0.470232	0.0500486
802	236426	497	56	0.210214	0.0236861	204222	555	45	0.271763	0.0220348
803	235320	773	44	0.328489	0.0186979	203503	848	59	0.416701	0.0289922
807	225407	564	44	0.250214	0.0195202	246998	598	75	0.242107	0.0303646
941	439708	2290	321	0.5208	0.05	451935	3126	356	0.691692	0.0787724
mean	284215	1031	116.25	0.327429	0.0279761	276664	1281.75	133.75	0.405566	0.040041
stdev	89876.3	733.977	118.32	0.120529	0.0142843	102791	1070.69	128.754	0.18025	0.0230227
	ttest		0.313729	0.0427734	0.253884			ttest	0.0999214	0.344998

## Sheet: Fig. 2, S2A Values
% of compartment CD45.1 (WT) or CD45.2 (KO) Positive
animal/pop	dn1	dn2	dn3	dn4	isp	dns	dp ps	SP4	sp8
KO1 KO	34.9	34.3	46	33.9	48.2	23.5	9.05	4.94	0.62
KO1 wt	57.2	61.4	49	48.6	44.8	65.2	85.5	93	96.4
KO2 KO	37.8	36.8	47.1	42.7	62.3	36	22.9	14.6	1.74
KO2 wt	55	59	49.5	49.3	32.1	56.5	71.8	83.1	97
KO3 KO	23	38.8	29.9	15.5	26.5	7.51	3.02	2.15	0.93
KO3 wt	49	53.6	60.4	76.1	71.2	91.9	93.1	96.3	98.1
KO4 KO	56.8	73.7	81.9	76.6	86.6	57.6	36.5	17.2	10.8
KO4 wt	21.5	21.1	15.8	15.7	10.1	41.3	54.2	78.4	85.7
Raw WT/KO Ratios
KO1 raw ratio	0.61014	0.558632	0.938776	0.697531	1.07589	0.360429	0.105848	0.0531183	0.00643154
KO2 raw ratio	0.687273	0.623729	0.951515	0.866126	1.94081	0.637168	0.318942	0.175692	0.0179381
KO3 raw ratio	0.469388	0.723881	0.495033	0.203679	0.372191	0.0817193	0.0324382	0.0223261	0.00948012
KO4 raw ratio	2.64186	3.49289	5.18354	4.87898	8.57426	1.39467	0.673432	0.219388	0.126021
DN1-Normalized WT/KO Ratios
KO1 norm ratio	1	0.91558	1.53862	1.14323	1.76335	0.590733	0.173481	0.0870592	0.0105411
KO2 norm ratio	1	0.907542	1.38448	1.26024	2.82393	0.927097	0.464068	0.255636	0.0261005
KO3 norm ratio	1	1.54218	1.05464	0.433926	0.792929	0.174098	0.0691076	0.0475642	0.0201968
KO4 norm ratio	1	1.32213	1.96208	1.8468	3.24554	0.527913	0.254908	0.0830429	0.0477016
Summary Data
	DN1	DN2	DN3	DN4	ISP	DP NS	DP PS	SP 4	SP 8
mean norm log2 ratio	0	0.228799	0.570419	0.2278	1.10865	-0.849544	-2.05654	-3.07916	-5.25787
sem norm log2 ratio	0	0.192361	0.185544	0.444592	0.458661	0.512326	0.576049	0.50712	0.45106

## Sheet: Fig. 2, S2C Values
KO (CD45.2)
Animal	%CD4	CD4 % mem	CD4 % ifng	CD4 % il4
141030 1	1.92	33.6	5.54	3.67
141030 2	2.61	18.6	4.52	2.96
141030 3	2.23	18.4	1.67	3.38
151216 1	4.73	28	2.4	4.4
151216 2	3.92	25.1	1.37	2.74
151216 3	3.51	23.6	1.64	3.87
140926 1	4.88	16.2
140926 2	3.7	37.1
WT (CD45.1)
141030 1	25.1	18.3	3.06	2.63
141030 2	30.5	11.9	3.37	1.45
141030 3	33.2	16.5	3.31	2.52
151216 1	37.4	17.3	1.11	2.93
151216 2	35.5	18.6	1.1	2.7
151216 3	33.4	12.8	1.62	2.96
140926 1	21.7	10.5
140926 2	19.4	12.6
	Total CD4	Memory	IFNγ+	IL-4+
avg KO spl	3.4375	25.075	2.85667	3.50333
avg WT spl	29.525	14.8125	2.26167	2.53167
stdev KO spl	1.1022	7.49528	0.713539	0.248953
stdev wt spl	6.66028	3.47774	0.449158	0.227324
ttest spl	3.07192e-08	0.00835196	0.496486	0.0163237
