# Supplementary material for: Histone Deacetylase 7 mediates tissue-specific autoimmunity via control of innate effector function in invariant Natural Killer T Cells
Source: eLife. 2018 Apr 17;7:e32109. doi: 10.7554/eLife.32109 (PMC5943034; doi:10.7554/eLife.32109)
Supplement: Figure 3—source data 1. — Figure 3D,F, and Figure 3—figure supplement 1E. [file elife-32109-fig3-data1.xlsx]

## Sheet: Fig. 3D Values
Percent of Tetramer-Positive Cells
Animal	%IFNγ pos	%IL-4 Pos	Average IFNG	STDEV IFNG	Average IL-4	STDEV IL-4
WT 1	25.7	13.5
WT 2	29.8	15.6
WT 3	22.94	16.82	26.1467	3.45174	15.3067	1.67933
Vα14 1	34.4	27.5
Vα14 2	35	34
Vα14 3	33.8	26.8	34.4	0.6	29.4333	3.97031
Vα14 X ΔP 1	6.2	4
Vα14 X ΔP 2	6.1	2.6
Vα14 X ΔP 3	6.24	4.03	6.18	0.072111	3.54333	0.817088

## Sheet: Fig. 3F Values
Va14	iNKT	Non-Tet CD4+
Animal	%LFA-1hi	%LFA-1hi	Average iNKT	STDEV iNKT	Average CD4 Tconv	STDEV CD4 Tconv
150603 1	86.2	7.64
150603 2	75.3	11.5
160427	84.6	10.5
160429	79.8	5.85	81.475	4.93381	8.8725	2.59532
Va14xdP	iNKT	Non-Tet CD4+
Animal	%LFA-1hi	%LFA-1hi
150603 1	21	12.1
150603 2	17.7	15.3
160427	25.9	9.03
160429	11.1	6.36	18.925	6.20987	10.6975	3.86197

## Sheet: Fig. 3, S1E Values
iNKT Cell Prevalence (% of TCRβ pos)
WT
	WT 1	WT 2	WT 3	WT 4	WT 5	Average	STDEV
Thymus	0.911162	1.50754	1.25673	1.67695	2.38278	1.54703	0.548982
Spleen	3.35625	2.78884	3.41297	2.51698	2.27191	2.86939	0.505018
Liver	31.5	32.1243	36.6155	33.1492	30.1205	32.7019	2.44736
VαX ΔP
Organ	VαX ΔP 1	VαX ΔP 2	VαX ΔP 3	VαX ΔP 4	VαX ΔP 5
Thymus	9.71223	9.45627	6.18893	6.97674	7.14286	7.8954	1.58583
Spleen	4.97925	2.5	2.85714	1.79856	2.01729	2.83045	1.27017
Liver	12.0833	8.06452	9.52622	7.29483	16.7866	10.7511	3.8362
