# Supplementary material for: Histone Deacetylase 7 mediates tissue-specific autoimmunity via control of innate effector function in invariant Natural Killer T Cells
Source: eLife. 2018 Apr 17;7:e32109. doi: 10.7554/eLife.32109 (PMC5943034; doi:10.7554/eLife.32109)
Supplement: Figure 7—source data 1. [file elife-32109-fig7-data1.xlsx]

## Sheet: Fig. 7D-E Values
Raw ratios from indicated primary image analysis (pulldown band area/input band area)									ratios normalized to PLZF only Background
Constructs (HDAC7/PLZF)	061115 analysis	100715 pulldown/input	042016 pulldown/input	062416 pulldown/input	071516 pulldown/input	072316 pulldown/input	072615 pulldown/input		061115 analysis	100715 pulldown/input	042016 pulldown/input	062416 pulldown/input	071516 pulldown/input	072316 pulldown/input	072615 pulldown/input	average ratio	sem ratio
PLZF Only (bkg)	0.247501	0.04	0.05	0.06	0.02	0.113	0.06		1	1	1	1	1	1	1	1	0
FL/FL	1.26554		0.43	0.25	0.083	0.33	0.438919				8.6	4.16667	4.15	2.92035	7.31531	5.43047	1.07555
1-497/FL		0.55	0.37	0.38		0.649	0.506068			13.75	7.4	6.33333		5.74336	8.43446	8.33223	1.43055
65-497/FL				0.9	0.158	0.948278	0.82379					15	7.9	8.39184	13.7298	11.2554	1.81667
120-497/FL				0.16	0.069	0.313852	0.218955					2.66667	3.45	2.77745	3.64925	3.13584	0.243389
1-220/FL			0.49	0.1		0.229748	1.07134				9.8	1.66667		2.03317	17.8557	7.83889	3.82955
1-180/FL			0.2	0.13	0.041	0.20464	0.0714693				4	2.16667	2.05	1.81097	1.19116	2.24376	0.470274
1-497/1-318	0.347739					0.14951	0.11504		1.405					1.3231	1.91734	1.54848	0.185939
1-497/1-405	0.503079					0.370093	0.28346		2.03264					3.27516	4.72433	3.34404	0.777787
1-497/105-460		0.32		0.69	0.792	1.03433	2.04443			8		11.5	39.6	9.15336	34.0739	20.4654	6.76406
1-497/280-673		0.47		0.98	0.807	1.02392	2.57594			11.75		16.3333	40.35	9.06127	42.9324	24.0854	7.2723
1-497/320-673			0.18	0.16	0.084	2.75742	1.81384				3.6	2.66667	4.2	24.4019	30.2307	13.0199	5.91387
1-497/395-673	0.321082	0.031				0.405627	0.232899		1.2973	0.775				3.58962	3.88165	2.38589	0.78879
1-497/455-673	0.141629					0.243	0.590291		0.572238					2.15044	9.83819	4.18696	2.86211
Fig 7D:	HDAC7 construct	normalized binding ratio	sem						Fig 7E:	PLZF construct	normalized binding ratio	sem
	None	1	0							Fl no HDAC7	1	0
	Fl	5.43047	1.07555							Fl	8.33	1.279
	1-497	8.33223	1.43055							1-318	1.54848	0.151818
	65-497	11.2554	1.81667							1-405	3.34404	0.635061
	120-497	3.13584	0.243389							105-460	20.4654	6.04996
	1-220	7.83889	3.82955							280-673	24.0854	6.50454
	1-180	2.24376	0.470274							320-673	13.0199	5.28953
										395-673	2.38589	0.683112
										455-673	4.18696	2.3369

## Sheet: Fig. 7F Values
Light Units (Normalized to Renilla Luciferase and Empty Vector)
gal4 construct	vp16 0715	vp16 0720	vp16 0722	vp16 0723	FL 0715	FL 0720	FL 0722	fl 0723		average empty	average VP16	sem vp16	ttest vp16	average FL	sem FL	ttest FL
PLZF FL	1.98	2.23	2.87	1.6		0.31	0.53	0.89		1	2.17	0.266865	0.0109865	0.576667	0.146401	0.0646291
PLZF 1-460	1.65	2.25	3.1	2.21	0.57	0.7	0.54	0.54		1	2.3025	0.299037	0.0111802	0.5875	0.0381608	0.00084684
PLZF 1-318	0.82	1.64	1.05	1.13	0.87	1.45	1.21	1.54		1	1.16	0.172964	0.211585	1.2675	0.149687	0.0859475
