# Supplementary material for: Histone Deacetylase 7 mediates tissue-specific autoimmunity via control of innate effector function in invariant Natural Killer T Cells
Source: eLife. 2018 Apr 17;7:e32109. doi: 10.7554/eLife.32109 (PMC5943034; doi:10.7554/eLife.32109)
Supplement: Figure 8—source data 1. — Figure 8C,D, and Figure 8—figure supplement 81D. [file elife-32109-fig8-data1.xlsx]

## Sheet: Fig. 8C Values
Serum ALT
Months	WT 1	WT2	WT3	WT4	WT5	WT6		wt:ΔP 1	wt:ΔP 2	wt:ΔP 3	wt:ΔP 4	wt:ΔP 5	wt:ΔP 6		Vα14:ΔP 1	Vα14:ΔP 2	Vα14:ΔP 3	Vα14:ΔP 4	Vα14:ΔP 5	Vα14:ΔP 6
2	36	41	36	39	17	30		147	43	13	15	29	27		52	29	15	25	52	25
3			40	45	38	40		120	80	36	59	39	55		45	60	59	61	50	56
4	66	30	53	30	42	29			294	34	98	32	74		36	28		72	54	44
Serum AST
Months	WT 1	WT2	WT3	WT4	WT5	WT6		wt:ΔP 1	wt:ΔP 2	wt:ΔP 3	wt:ΔP 4	wt:ΔP 5	wt:ΔP 6		Vα14:ΔP 1	Vα14:ΔP 2	Vα14:ΔP 3	Vα14:ΔP 4	Vα14:ΔP 5	Vα14:ΔP 6
2	74	65	59	61	50	74		176	112	83	66	96	87		151	63	51	72		60
3	40	45	45	45	78	61		400	210	84	124	62	151		55	130	90	98	121	115
4		137		74	46	43			667	93	112	66	106		76	90		112	114	79

## Sheet: Fig. 8D Values
Mean Weights	(% starting weight)						Survival
	WT: ΔP			Vα: ΔP				WT: ΔP			Vα: ΔP
Days	Mean	sem		Mean	sem		Day	# Surviving		Day	# Surviving
1	1	0		1	0		50	14		50	15
5	0.849778	0.0188352		0.87	0.0169192		54	12		64	14
8	0.910375	0.0223575		0.93	0.0131745		57	10
12	0.951252	0.0144826		0.96	0.0140744		61	9
15	0.946568	0.0142233		0.96	0.0136592		71	8		71	13
19	0.950437	0.0153721		0.98	0.0102135		75	7		78	12
22	0.968716	0.0210476		1	0.0118286		82	6		85	10
26	0.965069	0.0182233		1.01	0.0114198		110	5		110	10
29	0.954024	0.0178334		1.01	0.00909038
33	0.955992	0.0182744		1.01	0.00912092
36	0.955391	0.018811		1.01	0.00982282
40	0.939553	0.0187526		1.01	0.0103375
43	0.927217	0.0223254		1.01	0.0117322
47	0.916913	0.0256926		1	0.0146026
50	0.906972	0.0285442		1.01	0.0214301
54	0.911205	0.0347729		1.03	0.0161683
57	0.93977	0.0367394		1.03	0.0203468
Raw Weights
WT-dP Chimeras: (Animals removed from trial are shaded gray)																				Va14-dP Chimeras:
Day	1	2	3	4	5	6	7	8	9	10	11	12	13	14	15	16	17	18		Day	1	2	3	4	5	6	7	8	9	10	11	12	13	14	15	16	17
1	22.9	17.6	20.4	27.1	23.8	24	19.1	19.4	17.5	10.7	22.3	22.3	21.6	23.9	22.6	18.1	15.7	16.9		1	21.3	19.3	17.4	17.5	25.3	25.2	18.3	18.5	17.4	18.8	20.1	21.1	22.9	19.9	20.2	16.4	16.4
5	17.6	13.1	15.4	20.5	19.8	20.9	16.1	16.3	14	9	21.1	21.3	20.6	20.6	21.3	16.9	14.4	16.1		5	17.2	14.5	14	14.1	22.2	21.9	15.4	15.4	14.5	16	19.5	18.2	21.1	18.3	19.9	15.9	14.4
8	18.4	15.3	16.1	19.2	21.7	22.2	17.9	17.7	15.5	9.4	23.2	23.3	21.7	24.2	23.3	18.9	17.1	18.6		8	17.3	16.4	15.9	16.3	23.4	22.7	17	16.5	16.1	17.6	21.5	18.8	23.3	20.6	21.2	17.7	16.9
12	19.7	17.8	18.8	22.1	22	22.1	18	18.9	16.6	9.7	24.1	23.8	19	24.5	23.8	19.4	17.7	19		12	17.4	18.5	16.5	17.4	22.8	21.9	18.8	17.6	16.8	17.9	21.9	Died - Engraftment Failure	24.5	21	21.4	18.2	18.1
15	20.7	17.9	19.4	22.1	21.5	21.5	18.2	18.2	17.3	10.3	23.7	23.5	16.2-sac for engraftment failure	23.9	23.6	19.9	17.9	18.7		15	19.7	18.6	16.8	18	21.8	20.6	18.3	17.7	16.9	18.4	21.5	-	24.5	21	21.6	18.2	18.3
19	21.2	18.3	19.3	22.1	22.5	22.8	18.6	18.8	17	10.9	23.9	23.5		23.9	24	19.2	17.9	17.9		19	19.8	19.1	16.9	18.4	22.9	22.8	18.6	18.5	17.8	18.3	22.3		23.9	20.4	21.2	18.3	18.6
22	23	19.1	19.9	23.3	22.1	22.1	18	19	18.1	11.1	23.8	22.7		23.5	23.6	19.5	17.9	18.6		22	20	19.4	17.5	18.9	23.2	22.8	19	19.2	18.2	19	21.8		23.9	20.2	20.8	18.4	18.7
26	22.9	17.8	20.2	22.9	22.8	22.9	17.9	19.3	18.1	11.3	24.1	23.2		23.9	24.3	19.8	18.3	18.5		26	20.7	19.2	18.1	18.5	23.3	23.2	19.4	19.3	18.6	19.1	22.4		23.8	22.2	22.1	18.6	18.9
29	22.7	16.5	19.7	23.5	22.2	22.8	17.5	19	17.8	11.5	24	23.1		24	24	18.7	18.4	18.1		29	21.8	19.3	17.9	18.8	23.9	23.4	19	19.1	17.9	19.1	21.8		24.4	20.8	20.7	18.5	18.6
33	22.1	16.8	19.7	22.9	22.2	22.8	18.1	18.9	18.1	11.1	23.7	23.4		24.9	24.5	17.3	18.2	18.5		33	21.6	19	17	18.6	24.4	23.6	18.8	19.6	18.3	19.3	21.6		26.3	22	17.1	18.8	19.3
36	22.2	16.6	19.4	22.4	21.6	22.4	18.3	18.8	17.2	10.6	23.2	23.4		25	24.2	16.5	18.1	18.7		36	21.6	18.7	17	18.1	24	23.4	18.1	19.6	18.1	19.6	22		25.3	21.7	18.6	18.8	18.7
40	21.4	15.6	18.8	21.8	21.2	22.2	18.1	18.3	17.6	11	23.8	24		25.3	24.6	14.7	18.6	19.6		40	22.6	19.4	17.3	18.9	24.6	24.2	17.7	19.4	18.3	18.9	22.1		24.9	21.3	18.1	19.5	19.2
43	19.9	15.7	17.3	20.8	20.9	21.8	18.1	18.1	16.9	12.7	24.2	23.6		25.6	24.7	14.8	19.9	19.9		43	21.6	18.6	16.8	18.7	24.1	23.7	17.3	19.2	17.8	18.5	22.6		25.7	22.2	F.D.	19.5	19.8
47	19	14.7	17.5	21.1	18.9	21.3	17.9	18.2	17.6	Died - Malocclusion	24.5	23.8		26	24.6	Perfused	19.9	19.9		47	21.8	18.9	16.7	19.1	24.5	22.8	15.8	19	17.7	18.7	22.4		25.1	21.5		19.6	20.5
50	17	14.5	17.1	21	19	21.3	17.8	18.1	17		24.9	24		26.5	25		20.7	19.7		50	22.5	18.9	17	19.5	23.8	23.1	14	19.4	17.8	19.1	22.6		25.6	22.1		20	21.5
54	15.2-X (7.13.15)	13.4	16	18.8	20.1	20.7	17.6	18	16.9		24.9	24		26	25.2		20.3	19.3		54	21.8	17.8	17.3	19.7	24.9	24.5	12.6	19.4	17.1	19	22.6		26	22.4		20.4	21.6
57		13.5-X (Perfuse: 7.15.15)	15.8	19.3	20.8	21	17.6	18.1	16.8		25	24		26.3	25.3		20.4	19.3		57	22.2	17.3	16.9	19.5	24.5	23.7	Found Dead	19.4	16.5	19	22.7		25.9	22.2		20.2	21.2
61			15.7	19.6	24.1	20.5	17.6	17.7	15.2		25.5	24.3		26.5	24.8		19.9	19		61	21.8	18.8	17.4	19.9	24.2	23.9		19.6	14	18.5	22.8		25.2	22.7		20.1	21.2
64			Perfuse: 7.19.15	Perfuse: 7.19.15	Dead	20.2	17.6	17.6	14.9		25.3	24.3		26.4	25.4		20	18.8		64	21.7	18.6	17.1	19.3	24.5	24.5		19.1	13	18.1	22.7		26.3	22.8		20.1	21.1
68						20.6	17.7	18	16.3		25.5	24.5		26.6	25.3		20.2	19		68	21.6	18.7	17.6	20.1	24.6	24.5		19	12.1	18.1	22.9		26.2	22.7		20.1	20.9
71						19.7	17.8	17.1	15		26	24.7		26.7	25.5		20.3	18.8		71	21.6	19	17.7	20.5	24.2	23.5		18.3	Perfused	17.9	23.7		26.3	22.7		20.3	21.3
75						20.3	Took down for engraftment check	17.5	14.6		25.7	24.6		26.5	25.5		19.8	19.5		75	20.9	19.2	17.3	20.1	24.1	24.7		18		Took down for engraftment check	23.2		25.3	21.9		20	21
78						20.1		16.8	F.D.		25.7	24.7		26.9	25.4		19.9	19		78	20.6	19.4	17.4	20.4	24.5	23.5		18			23.2		25.7	22.6		20.3	20.8
82						20.2		17.4			26.2	25.1		27.1	25.7		20.3	19.5		82	17.4	19.5	17.4	20.6	25	20.2		18.8			23.6		26.7	22.9		20.7	20.9
85						20.1		17			26	25.3		26.7	25.8		20.7	19.7		85	15.7	19.4	17.5	20.6	24.8	18.7		18.9			23.6		26.5	23.1		20.2	20.9
89						20		17.5			26.1	25.1		24.8	25.8		20.6	19.5		89	FD-couldn't perfuse	19.6	17.5	20.6	25.1	17.2		19.3			23.7		26.4	23.5		20.5	20.8
92						19.7		17.2			26	24.7		22.6	25.8		19.9	19.1		92		19.1	17.1	20.4	25.4	16.4		19.2			23.6		26.4	23		20.4	20.9
96						18.8		17.2			26.7	25.1		23.7	26.1		20.2	19.4		96		19.4	17.4	20.8	24.6	15.4		19.3			24		26.9	23.6		20.7	21
99						18.7		17.5			26.5	24.8		25.4	25.9		20.6	19.2		99		19.3	17.5	20.1	24.6	F.D.		19.1			24.2		27.4	23.9		21	21
103						17		17.2			26.6	25.2		25.8	26.3		20.5	19.7		103		19.6	17.8	20.7	24.2			19			24		27	23.8		21.3	21.6
106						18.2		17.1			26.8	25.1		24.3	26.2		20.2	19.8		106		19.3	17.6	20.9	24.1			19.6			24.4		27.2	23.6		21.2	21.6
110						18.1		16.9			26.6	25.4		25.3	26		19.9	19.7		110		18.8	17.7	20.6	24.2			19.5			24.7		26.4	23.8		21.4	21.5
113						17.6		16.6			26.6	25.5		26.4	26.1		20.2	19.6		113		18.6	18	21	24.5			19.6			24.6		26.7	24.1		21.3	21.1
117						16.6		-			26.6	26.4		25.9	26.1		20.1	20.1		117		19	17.8	20.8	24.6			19.8			24.2		26.7	19.8		21.7	21.5
120						16.2					25.9	25.9		25.9	25.9		19.8	19.8		120		18.4	17.8	20.6	24.4			19.5			24.4		26.7	22		21.6	21.5
124											26.6	26.3		25.5	26.3		20.1	20.1		124		17.8	17.3	20.8	24.6			20.3			24.8		26.6	22.9		22.1	21.9
127											25.4	25.8		24.8	26.3		20.2	20.2		127		17.4	17.5	20.7	24.1			19.7			24.4		26.7	21.2		21.8	21.5
131											24.2	25.5		24.4	25.8		19.8	20.1		131		16.4	17.6	20.6	24.9			20.3			23.8		26.7	21.1		21.5	21.7

## Sheet: Fig. 8, S1D Values
Serum Lipase
Months	WT 1	WT2	WT3	WT4	WT5	WT6		wt:ΔP 1	wt:ΔP 2	wt:ΔP 3	wt:ΔP 4	wt:ΔP 5	wt:ΔP 6		Vα14:ΔP 1	Vα14:ΔP 2	Vα14:ΔP 3	Vα14:ΔP 4	Vα14:ΔP 5	Vα14:ΔP 6
2	64	30	44	38	44	63		43	60	81	66	73	58		38	56	48	61	58	62
3			30	60	37	42		55	50	98	64	55	53		75	65	60	55	11	28
4	70	42	49	52	29	55			79	39	69	36	33		38	57		53	51	66
