# Supplementary material for: Histone Deacetylase 7 mediates tissue-specific autoimmunity via control of innate effector function in invariant Natural Killer T Cells
Source: eLife. 2018 Apr 17;7:e32109. doi: 10.7554/eLife.32109 (PMC5943034; doi:10.7554/eLife.32109)
Supplement: Supplementary file 2. [file elife-32109-supp2.xls]

## Sheet: Sheet0
	Ingenuity Canonical Pathway	Spleen -logP	Molecules Spleen	Thymus -log P	Molecules thymus
	T Helper Cell Differentiation	6.62	IFNG,ICOS,TBX21,GATA3,IL13,IL4,IL18R1	3.19	ICOS,FCER1G,IL13,IL4,IL18R1
	Hepatic Fibrosis / Hepatic Stellate Cell Activation	2.29	IFNG,IGF2,CXCR3,FASLG,IL4	4.89	IGF2,CCR5,CSF1,CXCR3,KLF12,PDGFC,FASLG,TIMP2,IL4,IL18RAP
	Airway Inflammation in Asthma	3.67	IL13,IL4	3.25	IL13,IL4
	Role of Pattern Recognition Receptors in Recognition of Bacteria and Viruses	3.01	IFNG,IL13,PRKD3,IL4,C5	2.85	OAS1,TLR1,OAS3,IL13,IL4,C5
	Stearate Biosynthesis I (Animals)	2.88	ACSBG1,SLC27A6,ACOT7	0.527	ACSBG1
	Altered T Cell and B Cell Signaling in Rheumatoid Arthritis	1.79	IFNG,FASLG,IL4	2.77	CSF1,TLR1,FCER1G,FASLG,IL4
	Crosstalk between Dendritic Cells and Natural Killer Cells	2.68	IFNG,CD226,FASLG,IL4	0.667	FASLG,IL4
	Fatty Acid Activation	2.57	ACSBG1,SLC27A6	0.923	ACSBG1
	Nitric Oxide Signaling in the Cardiovascular System	2.5	PDE2A,GUCY1A3,PDE3B,PRKD3	1.13	PDE2A,PDE3B,PDGFC
	Pathogenesis of Multiple Sclerosis	1.27	CXCR3	2.49	CCR5,CXCR3
	Role of Cytokines in Mediating Communication between Immune Cells	2.37	IFNG,IL13,IL4	1.01	IL13,IL4
	Mitochondrial L-carnitine Shuttle Pathway	2.33	ACSBG1,SLC27A6	0.814	ACSBG1
	γ-linolenate Biosynthesis II (Animals)	2.33	ACSBG1,SLC27A6	0.814	ACSBG1
	Glutamate Receptor Signaling	2.3	GRIK5,HOMER2,GRM4	0.973	GRIK5,HOMER2
	Hematopoiesis from Multipotent Stem Cells	1.15	IL4	2.23	CSF1,IL4
	PTEN Signaling	0.291	FASLG	2.22	NTRK3,INPPL1,CNKSR3,DDR1,FASLG
	Differential Regulation of Cytokine Production in Intestinal Epithelial Cells by IL-17A and IL-17F	2.07	IFNG,IL13	0.695	IL13
	Protein Kinase A Signaling	2.04	PDE2A,PDE3B,PTPRB,PTPN5,PTPN3,PRKD3,EYA2	0.49	PDE2A,PTPN13,PDE3B,PTPRB,PTPN5
	nNOS Signaling in Skeletal Muscle Cells			2.04	SNTB2,NOS1
	Autoimmune Thyroid Disease Signaling	1.48	FASLG,IL4	1.97	FCER1G,FASLG,IL4
	Hematopoiesis from Pluripotent Stem Cells	0.605	IL4	1.97	CSF1,FCER1G,IL4
	NAD Salvage Pathway II	1.97	NT5E,NMNAT2	0.648	NMNAT2
	Role of Osteoblasts, Osteoclasts and Chondrocytes in Rheumatoid Arthritis	1.97	IFNG,BMP7,IL4,IL18R1,ITGB3	1.2	CSF1,ALPL,IL4,IL18R1,IL18RAP
	PPAR Signaling	0.365	CITED2	1.89	RXRA,PDGFC,CITED2,IL18RAP
	Allograft Rejection Signaling	1.84	IFNG,FASLG,IL4	1.31	FCER1G,FASLG,IL4
	Fatty Acid β-oxidation I	1.8	ACSBG1,SLC27A6	0.57	ACSBG1
	Hepatic Cholestasis	1.78	IFNG,IL13,PRKD3,IL4	1.68	TIRAP,RXRA,IL13,IL4,IL18RAP
	tRNA Splicing	1.72	PDE2A,PDE3B	1.34	PDE2A,PDE3B
	Fc Epsilon RI Signaling	1.56	IL13,PRKD3,IL4	1.67	FCER1G,INPPL1,IL13,IL4
	Glioma Signaling	1.66	IGF2,RBL2,PRKD3	0.607	IGF2,PDGFC
	Granulocyte Adhesion and Diapedesis	1.65	XCL1,HRH4,ITGB3,C5	0.605	HRH4,IL18RAP,C5
	Natural Killer Cell Signaling	1.54	KLRB1,Klra7 (includes others),PRKD3	1.64	KLRB1,FCER1G,Klra7 (includes others),INPPL1
	Role of Macrophages, Fibroblasts and Endothelial Cells in Rheumatoid Arthritis	0.575	PRKD3,IL18R1,C5	1.58	F2RL1,CSF1,TLR1,PDGFC,IL18R1,IL18RAP,C5
	NF-κB Signaling			1.57	NTRK3,TLR1,FCER1G,TIRAP,DDR1
	Gα12/13 Signaling			1.56	F2R,F2RL1,CDH3,CDH13
	4-aminobutyrate Degradation I			1.54	ALDH5A1
	CCR5 Signaling in Macrophages	1.18	PRKD3,FASLG	1.53	CCR5,FCER1G,FASLG
	Corticotropin Releasing Hormone Signaling	1.53	GUCY1A3,PRKD3,FASLG	0.531	NOS1,FASLG
	Atherosclerosis Signaling	0.763	IFNG,TNFSF14	1.48	CSF1,CCR2,PDGFC,TNFSF14
	Type II Diabetes Mellitus Signaling	1.48	ACSBG1,SLC27A6,PRKD3
	Graft-versus-Host Disease Signaling	1.47	IFNG,FASLG	1.1	FCER1G,FASLG
	Primary Immunodeficiency Signaling	1.47	IL7R,ICOS	0.426	ICOS
	NAD Biosynthesis III	1.45	NMNAT2	1.24	NMNAT2
	Pentose Phosphate Pathway (Non-oxidative Branch)	1.45	TKTL1	1.24	TKTL1
	HMGB1 Signaling	1.44	IFNG,IL13,IL4	0.486	IL13,IL4
	Sperm Motility	1.43	PDE2A,GUCY1A3,PRKD3
	Cytotoxic T Lymphocyte-mediated Apoptosis of Target Cells	0.753	FASLG	1.41	FCER1G,FASLG
	RAR Activation	0.966	PRKD3,ZBTB16,CITED2	1.41	ADH1C,RXRA,ZBTB16,RARG,CITED2
	NAD Biosynthesis from 2-amino-3-carboxymuconate Semialdehyde	1.38	NMNAT2	1.18	NMNAT2
	NAD Salvage Pathway III	1.38	NMNAT2	1.18	NMNAT2
	Cellular Effects of Sildenafil (Viagra)	1.36	PDE2A,GUCY1A3,PDE3B	0.446	PDE2A,PDE3B
