# Supplementary material for: Histone Deacetylase 7 mediates tissue-specific autoimmunity via control of innate effector function in invariant Natural Killer T Cells
Source: eLife. 2018 Apr 17;7:e32109. doi: 10.7554/eLife.32109 (PMC5943034; doi:10.7554/eLife.32109)
Supplement: Supplementary file 3. [file elife-32109-supp3.xls]

## Sheet: Sheet0
IPA Upstream Regulator	Molecule Type	Predicted Activation State	Activation z-score	Spleen p-value of overlap	thymus p-value of overlap	Thymus Target molecules in dataset	Spleen Target molecules in dataset
ITK	kinase	Inhibited	-2.860	5.73e-19	4.7e-16	ARAP3,CPNE7,F2R,FASLG,FCER1G,IL13,IL18RAP,IL4,Klra7 (includes others),KLRB1,Ly6a (includes others),MAF,SPRY2,TIRAP,ZBTB16	ARL4D,CD7,CPNE7,CYSLTR2,FASLG,GATA3,IFNG,IL13,IL4,Klra7 (includes others),KLRB1,SPRY2,TBX21,XCL1,ZBTB16
ID2	transcription regulator	Activated	2.236	1.34e-16	4.19e-10	CSF1,CXCR3,CXCR6,FCER1G,HOMER2,IL4,IL9R,MAF,PTPN13,PTPN5,RORA,SOX5,TNFSF14,ZBTB16	BMP7,CXCR3,CXCR6,DTX1,HOMER2,IFNG,IL17RB,IL4,IL7R,ITGB3,LMO4,PTPN3,PTPN5,RORA,SOX13,TNFSF14,ZBTB16
ID3	transcription regulator	Activated	2.236	2.64e-16	7.12e-10	CSF1,CXCR3,CXCR6,FCER1G,HOMER2,IL4,IL9R,MAF,PTPN13,PTPN5,RORA,SOX5,TNFSF14,ZBTB16	BMP7,CXCR3,CXCR6,DTX1,HOMER2,IFNG,IL17RB,IL4,IL7R,ITGB3,LMO4,PTPN3,PTPN5,RORA,SOX13,TNFSF14,ZBTB16
IL12 (complex)	complex	Inhibited	-2.318	3.73e-14	3.47e-09	CCR2,CCR5,CSF1,CXCR3,FASLG,FUT7,ICOS,IL13,IL18R1,IL18RAP,IL4,ITGAE,KLRB1,Ly6a (includes others)	CCR4,CD226,Ctla2a/Ctla2b,CXCR3,FASLG,FUT7,GATA3,ICOS,IFNG,IL13,IL18R1,IL4,IL7R,KLRB1,TBX21,XCL1
TGFB1	growth factor	Inhibited	-2.665	1.46e-06	3.44e-13	ADAM19,AHNAK,ALDH5A1,APP,C5,CCR2,CCR5,CCRL2,CITED2,CRMP1,CSF1,CXCR3,CXCR6,DTX4,F2R,F2RL1,FASLG,FCER1G,FUT7,GCNT1,HBEGF,ID2,IFI30,IGF2,IL13,IL4,ITGAE,KLRB1,LGALS3,LITAF,Ly6a (includes others),MAF,NMNAT2,NPAS2,P2RY1,PLK2,RARG,RBPMS,RORA,RXRA,S100A4,SMTN,SNTB2,TIMP2,TTC28,UST,VDR	ABI2,BMP7,C5,CCR4,CITED2,CXCR3,CXCR6,FASLG,FUT7,GATA3,ID2,IFNG,IGF2,IL13,IL17RB,IL4,ITGB3,KLRB1,NMNAT2,NPAS2,NT5E,PCGF2,RBL2,RORA,TACC2,TBX21
lipopolysaccharide	chemical drug	Inhibited	-3.426	0.000418	2.12e-12	APP,AR,C5,CCR2,CCR5,CCRL2,CD160,CD38,CD9,CMPK2,CRTAP,CSF1,CXCR3,ERO1A,F2R,F2RL1,FASLG,FCER1G,FFAR2,H19,HBEGF,HHEX,ID2,IL13,IL18R1,IL18RAP,IL4,LGALS3,LITAF,Ly6a (includes others),MAF,NOS1,OAS1,OAS3,PCDH7,PERP,PLK2,PTPRB,RXRA,SNTB2,TIMP2,TIRAP,TLR1,TNFSF14,TNFSF18,VDR	AR,C5,CCR4,CD160,CXCR3,ERO1A,FASLG,GUCY1A3,H19,ID2,IFNG,IL13,IL18R1,IL4,IL7R,PTPRB,SOX13,TBX21,TNFSF14,TNK2,XCL1
IL2	cytokine	Inhibited	-3.886	8.06e-12	1.91e-11	CCR2,CCR5,CD160,CD38,CSF1,CTSW,CXCR3,CXCR6,FASLG,FCER1G,GCNT1,ICOS,IL13,IL18R1,IL18RAP,IL4,ITGAE,KLRB1,Ly6a (includes others),MAF,PDE3B,PDGFC,S100A4,TNFSF14	CCR4,CD160,CTSW,CXCR3,CXCR6,FASLG,GATA3,ICOS,IFNG,IL13,IL17RB,IL18R1,IL4,IL7R,KLRB1,PDE3B,PRKX,TBX21,TNFSF14,XCL1
CD28	transmembrane receptor	Activated	2.896	8.53e-12	5.6e-08	CCR5,CXCR3,CXCR6,FASLG,FCER1G,H19,HOMER2,ICOS,IL13,IL18R1,IL4,MAF,NOS1,ORAI3,RORA,TNFSF18	CCR4,CD226,CXCR3,CXCR6,FASLG,GATA3,H19,HOMER2,ICOS,IFNG,IL13,IL18R1,IL4,IL7R,RORA,TBX21,XCL1
IL4	cytokine		-1.915	8.58e-11	1.21e-11	ABCA2,ADAM19,ARSB,CAPG,CCR5,CD38,CITED2,CSF1,CST7,CXCR3,F2R,F2RL1,FASLG,FCER1G,FNIP2,FUT7,HOMER2,ICOS,IFI30,IL13,IL18R1,IL18RAP,IL4,ITGAE,KLRB1,LGALS3,MAF,TIMP2,TNFSF18,VDR	ABCA2,CCR4,CITED2,Ctla2a/Ctla2b,CXCR3,CYSLTR2,FASLG,FUT7,GATA3,HOMER2,ICOS,IFNG,IL13,IL17RB,IL18R1,IL4,IL7R,ITGB3,KLRB1,SOX13,TBX21,XCL1,ZCCHC18
IL21	cytokine	Inhibited	-2.436	1.99e-11	3.97e-11	CCRL2,CD38,CMPK2,CXCR3,FASLG,FCER1G,ID2,IL13,IL18R1,IL18RAP,IL4,Klra7 (includes others),KLRB1,RORA,TIRAP	CXCR3,FASLG,GATA3,ID2,IFNG,IL13,IL18R1,IL4,IL7R,Klra7 (includes others),KLRB1,RORA,TBX21
STAT5A	transcription regulator			6.9e-11	3.14e-08	AR,CCR5,CXCR3,FASLG,FCER1G,ID2,IL4,Klra7 (includes others),KLRB1,MAF,OAS1,QPCT,RIN2,RORA,SETBP1	AR,C9orf152,Ctla2a/Ctla2b,CXCR3,EPAS1,FASLG,ID2,IFNG,IL4,IL7R,Klra7 (includes others),KLRB1,QPCT,RORA,TBX21
FOXP3	transcription regulator		0.406	1.55e-10	1.56e-07	CCR2,FASLG,ICOS,ID2,IL4,ITGAE,MAF,NTRK3,PDE3B	CCR4,FASLG,ICOS,ID2,IFNG,IGSF3,IL4,IL7R,NT5E,PDE3B
TBX21	transcription regulator		-0.173	1.96e-10	3.13e-06	CD38,CXCR3,ICOS,IL13,IL4,ITGAE	CCR4,CXCR3,GATA3,ICOS,IFNG,IL13,IL4,TBX21
TRB	transmembrane receptor			4.99e-10	8.6e-06	CXCR3,FASLG,IL13,IL4,ITGAE	CXCR3,FASLG,GATA3,IFNG,IL13,IL4,NT5E
CD3	complex	Activated	3.070	5.89e-10	1.24e-08	ATP8A2,CCR2,CCR5,CTSW,CXCR3,CXCR6,FASLG,FCER1G,FUT7,H19,HOMER2,ICOS,IL13,IL18R1,IL4,Ly6a (includes others),MAF,NOS1,ORAI3,PTPN13,RORA,RXRA,TNFSF18	ATP8A2,CCR4,CD226,CTSW,CXCR3,CXCR6,FASLG,FUT7,GATA3,H19,HOMER2,ICOS,IFNG,IL13,IL18R1,IL4,IL7R,RORA,TBX21,XCL1
ZBTB16	transcription regulator		-1.964	6.33e-10	0.000648	F2R,IL18R1,IL4,KLRB1,Ly6a (includes others)	BMP7,DTX1,IL18R1,IL4,IL7R,ITGB3,KCNJ8,KLRB1,LMO4
STAT3	transcription regulator		-1.680	1.48e-06	1.24e-09	C5,CCR5,CCRL2,CD9,CMPK2,CXCR3,FASLG,FCER1G,FFAR2,ICOS,ID2,IFI30,IL13,IL18R1,IL4,IL9R,MAF,OAS1,OAS3,PTPN13,RORA,VDR	C5,CD226,CXCR3,EPAS1,FASLG,GATA3,ICOS,ID2,IFNG,IL13,IL18R1,IL4,RORA,TBX21
TIGIT	other		-1.153	1.38e-09			GATA3,IFNG,IL13,IL4,TBX21
TCR	complex		-1.882	1.56e-09	4.19e-07	CCR2,CCR5,CD38,CXCR3,FASLG,ICOS,IL13,IL18R1,IL4,Klra7 (includes others),MAF,OAS1,PDE3B,VDR	CCR4,CXCR3,FASLG,GATA3,ICOS,IFNG,IL13,IL18R1,IL4,IL7R,Klra7 (includes others),PDE3B,TBX21,XCL1
GATA3	transcription regulator	Inhibited	-2.525	2.08e-09	0.000471	CCR2,ICOS,IL13,IL4,IL9R,ITGAE,MAF,ZBTB16	CCR4,CHST2,DTX1,GATA3,ICOS,IFNG,IL13,IL17RB,IL4,IL7R,TBX21,ZBTB16
IL15	cytokine	Inhibited	-3.377	2.62e-09	4.47e-09	CCR2,CD160,CD38,CSF1,CTSW,CXCR6,FASLG,GCNT1,ICOS,IL13,IL18R1,IL18RAP,IL4,Klra7 (includes others),KLRB1,MAF,PTPN13,VDR	CD160,CD226,CTSW,CXCR6,FASLG,GATA3,ICOS,IFNG,IL13,IL18R1,IL4,IL7R,Klra7 (includes others),KLRB1,TBX21
Immunoglobulin	complex		-0.564	1.06e-06	3.31e-09	APP,CCR2,CHN2,CSF1,FCER1G,ICOS,IFI30,IL13,IL18R1,IL4,ITGAE,Ly6a (includes others),MICAL2,NOS1,ZBTB16	CHN2,GATA3,ICOS,IFNG,IL13,IL17RB,IL18R1,IL4,TBX21,ZBTB16
RUNX1	transcription regulator		0.651	4.8e-09	2.97e-06	ATP8A2,CD160,CSF1,IL4,KLRB1,Ly6a (includes others),PCDH7,SOX5,ZBTB16	ATP8A2,CD160,GATA3,IFNG,IL4,IL7R,ITGB3,KLRB1,ZBTB16,ZCCHC18
CTLA4	transmembrane receptor	Activated	2.190	5.01e-09	0.000344	FASLG,HRH4,ICOS,IL13,IL4	FASLG,GATA3,HRH4,ICOS,IFNG,IL13,IL4,PRKD3
BACH2	transcription regulator		1.172	5.37e-09	0.000615	IL13,IL4,ITGAE,PDE3B	CCR4,GATA3,IFNG,IL13,IL4,PDE3B,TBX21
IFNG	cytokine	Inhibited	-3.934		6.53e-09	AGRN,APP,CCR2,CCR5,CCRL2,CD38,CDH13,CMPK2,CSF1,CXCR3,F2R,F2RL1,FASLG,FCER1G,HBEGF,HRH4,IFI30,IL13,IL18R1,IL18RAP,IL4,LGALS3,Ly6a (includes others),NOS1,OAS1,OAS3,P2RY1,PCTP,PTPRB,SMTN,TLR1,TTC28,VDR,ZBTB16
ICOS	transmembrane receptor		-1.992	7.43e-09	0.000729	ICOS,IL13,IL4,MAF	CCR4,GATA3,ICOS,IFNG,IL13,IL4,TBX21
IL18	cytokine	Inhibited	-2.583	7.89e-09	0.000256	CCR5,CSF1,FASLG,IL13,IL18R1,IL18RAP,IL4	CCR4,CD226,CYSLTR2,FASLG,IFNG,IL13,IL18R1,IL4,TBX21,XCL1
beta-estradiol	chemical - endogenous mammalian		-1.375	0.000384	8.86e-09	ADH1C,AGRN,APP,AR,C1QTNF6,CAP2,CCR2,CCR5,CITED2,DDR1,F2RL1,FASLG,FGD6,H19,HBEGF,ID2,IFI30,IGF2,IL13,IL4,ITGAE,LGALS3,LITAF,LMO7,LPCAT2,NOS1,NTRK3,OSBPL3,OSBPL5,PDE3B,PLK2,PTPN13,PTPN5,RBPMS,RXRA,SMPDL3A,SOX5,SPOCK2,SPRY2,TIMP2,VDR	AR,CAP2,CCR4,CITED2,EPAS1,FASLG,GUCY1A3,H19,ID2,IFNG,IGF2,IL13,IL4,IL7R,ITGB3,KCNQ5,OSBPL5,PDE3B,PTPN5,RBL2,SMPDL3A,SPRY2
TNF	cytokine	Inhibited	-3.238	5.41e-05	1.43e-08	APP,AR,C5,CCR2,CCR5,CD38,CDH13,CITED2,CSF1,CST7,CXCR3,F2RL1,FASLG,FCER1G,FUT7,H19,HBEGF,ICOS,IGF2,IL13,IL18R1,IL4,Kcnn2,LGALS3,LITAF,MAN1C1,NOS1,OAS1,OAS3,PCDH7,PDE2A,PLK2,RBPMS,ROBO1,RXRA,SMPDL3A,TIMP2,TNFSF14,VDR	AR,C5,CCR4,CHST2,CITED2,CXCR3,FASLG,FUT7,H19,ICOS,IFNG,IGF2,IL13,IL17RB,IL18R1,IL4,IL7R,ITGB3,PDE2A,SMPDL3A,ST3GAL6,TBX21,TNFSF14
IL5	cytokine	Inhibited	-3.850		3.45e-08	CCR2,CCR5,CCRL2,CITED2,CKAP4,CXCR3,ERO1A,HBEGF,IFI30,IL13,IL4,LMO7,RBPMS,S100A4,TLR1
IL12 (family)	group		-0.108	3.61e-08	1.24e-05	CCR5,FASLG,ICOS,IL13,IL18R1,IL18RAP,IL4	FASLG,GATA3,ICOS,IFNG,IL13,IL18R1,IL4,TBX21
CREBBP	transcription regulator		0.200	4.26e-08	3.44e-07	AR,CAPG,CCR5,CD160,CSF1,CST7,CXCR3,FASLG,FUT7,IL18R1,IL18RAP,MAF,NPAS2,NTRK3,OAS3,PDE3B	AR,BMP7,CD160,CXCR3,DTX1,EYA2,FASLG,FUT7,IFNG,IL18R1,IL7R,NPAS2,PDE3B,PLEKHF1
cyclosporin A	biologic drug		1.342	1.3e-06	7.14e-08	APP,ATP8A2,CCR5,CXCR3,FASLG,GPNMB,ICOS,IL13,IL4,ITGAE,LGALS3,MAF,NOS1,PDE3B,PERP,RXRA,SMTN,TNFSF14	ATP8A2,CXCR3,FASLG,GPNMB,ICOS,IFNG,IL13,IL4,PDE3B,PRKD3,TBX21,TNFSF14,XCL1
Klra7 (includes others)	transmembrane receptor		-0.498	8.09e-08			FASLG,IFNG,Klra7 (includes others),TBX21,XCL1
CSF2	cytokine	Inhibited	-2.653	0.000255	1.11e-07	CCR5,CD38,CSF1,CXCR3,F2R,F2RL1,FFAR2,HBEGF,HRH4,ICOS,ID2,IL13,IL4,ITGAE,STEAP3,TLR1,TNFSF14,VDR	CXCR3,DOK2,HRH4,ICOS,ID2,IFNG,IL13,IL4,ITGB3,TNFSF14
galactosylceramide-alpha	chemical reagent	Inhibited	-2.161	1.17e-07	3e-05	FASLG,ICOS,IL13,IL4,LGALS3	FASLG,GATA3,ICOS,IFNG,IL13,IL4
STAT6	transcription regulator		-1.719	2.33e-05	1.25e-07	ADAM19,CCR5,CD38,CST7,CTSW,FCER1G,FNIP2,ICOS,IL13,IL18R1,IL4,Ly6a (includes others),MAF,PDGFC	CTSW,GATA3,ICOS,IFNG,IL13,IL18R1,IL4,SOX13,TBX21
DUSP16	phosphatase		0.000	1.25e-07			GATA3,IFNG,IL4,TBX21
EGR2	transcription regulator	Inhibited	-2.176	1.72e-07	0.000345	FASLG,ID2,IGF2,IL4,ITGAE,ROBO1,ZBTB16	FASLG,GATA3,ID2,IFNG,IGF2,IL4,IL7R,TBX21,ZBTB16
tacrolimus	chemical drug	Activated	2.355	1.74e-07	1.35e-06	APP,CHN2,CXCR3,FASLG,HOMER2,IL13,IL4,MAF,NOS1,PDE3B,TRPM6	CHN2,CXCR3,FASLG,HOMER2,IFNG,IL13,IL4,PDE3B,TRPM6,XCL1
TXK	kinase		-0.058	2.07e-07			IFNG,KLRB1,TBX21,ZBTB16
dexamethasone	chemical drug		-0.908	2.59e-07	2.19e-06	APP,C5,CCR2,CHAD,CMPK2,CSF1,CXCR3,F2RL1,FASLG,GPR68,HBEGF,HOMER2,ID2,IGF2,IL13,IL18R1,IL4,LGALS3,LITAF,Ly6a (includes others),MAF,NOS1,PER3,PLK2,RAB4A,RARG,RORA,RXRA,SPOCK2,TIMP2,TNFSF14,TNS4,TRPM6,VDR,ZBTB16	ACOT7,C5,CXCR3,EPAS1,EYA2,FASLG,GATA3,GPR68,HOMER2,ID2,IFNG,IGF2,IL13,IL17RB,IL18R1,IL4,IL7R,ILVBL,ITGB3,LMO4,RAB4A,RBL2,RORA,TBX21,TNFSF14,TRPM6,XCL1,ZBTB16
IL2RG	transmembrane receptor		-1.511	3.51e-07			IFNG,IL4,IL7R,ILVBL,Klra7 (includes others),KLRB1
STAT4	transcription regulator	Inhibited	-2.789	5.34e-07	4.36e-06	AHNAK,CCR5,ERO1A,FCER1G,IL13,IL18R1,IL18RAP,MAGED1,RORA,S100A4,SMPDL3A	Ctla2a/Ctla2b,ERO1A,GATA3,IFNG,IL13,IL18R1,PRDM16,RORA,SMPDL3A,TBX21
IL12A	cytokine		-0.966	5.65e-07	0.000105	CXCR6,FASLG,FUT7,ICOS,IL4	CXCR6,FASLG,FUT7,ICOS,IFNG,IL4
ionomycin	chemical reagent	Inhibited	-2.598	5.89e-07	0.000821	AHNAK,FASLG,ICOS,IL13,IL4,MAF,TNFSF14	FASLG,GATA3,ICOS,IFNG,IL13,IL4,TBX21,TNFSF14,XCL1
CHD4	enzyme			6.33e-07	0.000115	CPNE7,ID2,IL13,IL4,TIMP2	CPNE7,ID2,IL13,IL4,SYDE1,TBX21
PRKCQ	kinase	Inhibited	-2.145	7.1e-07			FASLG,IFNG,IL13,IL4,TBX21
HLA-E	transmembrane receptor			7.22e-07	0.000463	IL13,IL4	IFNG,IL13,IL4
Il12 receptor	complex			7.22e-07			IFNG,IL4,TBX21
IL27	cytokine		0.277	7.28e-07	0.000993	FASLG,ICOS,IL13,IL4,MAF,TNFSF14	FASLG,GATA3,ICOS,IFNG,IL13,IL4,TBX21,TNFSF14
Akt	group	Inhibited	-2.200	8.69e-07	0.00109	AR,CXCR3,FASLG,IGF2,IL13,IL4,NOS1,TNFSF14	AR,CXCR3,EPAS1,FASLG,IGF2,IL13,IL4,IL7R,PRDM16,TNFSF14
SCAVENGER receptor CLASS A	group		-0.283	9.67e-07			IFNG,IL13,IL4,TBX21
Nfat (family)	group	Inhibited	-2.573	1.21e-05	1.26e-06	F2RL1,FASLG,HBEGF,IL13,IL4,KIF13A,PDE3B,TNFSF14	FASLG,IFNG,IL13,IL4,PDE3B,TNFSF14
SH2D1A	other		-1.341	1.31e-06			GATA3,ICOS,IFNG,IL4
progesterone	chemical - endogenous mammalian		-1.710	0.000568	1.37e-06	ALPL,AR,CCR2,CCR5,CITED2,CSF1,F2R,F2RL1,FASLG,H19,HBEGF,IL13,IL4,LGALS3,LITAF,LMO7,PLK2,SMPDL3A,VDR	ACOT7,AR,CITED2,EPAS1,FASLG,H19,HOPX,IFNG,IL13,IL4,SMPDL3A
TAF4	transcription regulator		1.016	0.00177	1.37e-06	AR,CDH3,HBEGF,ID2,LRRC16A,OAS1,PDGFC,TGM3	AR,HOPX,ID2,TGM3
CD80	transmembrane receptor		-0.966	1.58e-06			FASLG,ICOS,IFNG,IL4,TBX21
SCGB1A1	cytokine			1.74e-06	0.000352	FASLG,IL13,IL4	FASLG,IFNG,IL13,IL4
MNK1/2	group			1.8e-06	0.000767	IL4,SPRY2	IFNG,IL4,SPRY2
CD4	transmembrane receptor		-1.172	1.83e-06	0.000282	CXCR6,FASLG,IL4,ITGAE	CXCR6,FASLG,IFNG,IL4,TBX21
IRF4	transcription regulator		-0.918	1.87e-06	0.00188	ALPL,IL13,IL18RAP,IL4,OAS1,RORA	GATA3,IFNG,IL13,IL4,IL7R,RORA,TBX21,XCL1
MAPK1	kinase		0.731	3.61e-06	1.9e-06	ADH1C,AR,ARSB,CTSW,ENDOD1,FASLG,GRAMD1B,IL13,LGALS3,OAS1,OAS3,OSBPL3,SPRY2,VDR	AR,CHST2,CTSW,FASLG,GATA3,IFNG,IL13,ITGB3,NT5E,SPRY2,TBX21
NFATC2	transcription regulator		-1.931	1.97e-06	4.89e-05	CITED2,CMPK2,FASLG,ICOS,IL13,IL4,MAF,PLK2	CITED2,FASLG,GATA3,ICOS,IFNG,IL13,IL4,LMO4
PPIF	enzyme		0.000	1.76e-05	2.07e-06	CCR2,CCR5,CCRL2,CITED2,CXCR3,CXCR6,IL13,PDZRN3	CITED2,CXCR3,CXCR6,IL13,XCL1,ZCCHC18
IL23	complex			2.41e-06	0.000348	CCR2,ICOS,IL4,RORA	ICOS,IFNG,IL4,RORA,TBX21
EZH2	transcription regulator			3.31e-06	2.89e-05	ALPL,CCR5,CXCR3,GPR68,GRIK5,IL13,IL18R1,IL18RAP,IL4,S100A4,SPOCK2	CXCR3,EPAS1,GATA3,GPR68,GRIK5,IFNG,IL13,IL18R1,IL4,TBX21
Notch	group	Inhibited	-2.017	3.52e-06			GATA3,GUCY1A3,ID2,IFNG,IL4,TBX21
ETS1	transcription regulator		-1.650	3.53e-06	0.000608	CITED2,FASLG,ID2,IL4,ITGAE,Klra7 (includes others),PERP,TNFSF14	CITED2,FASLG,ID2,IFNG,IL4,ITGB3,Klra7 (includes others),TBX21,TNFSF14
IL25	cytokine		-1.940	3.55e-06			GATA3,IFNG,IL13,IL17RB,IL4
IL22RA2	transmembrane receptor			3.58e-06	0.00114	IL13,IL4	IFNG,IL13,IL4
praziquantel	chemical drug			3.58e-06	0.00114	IL13,IL4	IFNG,IL13,IL4
BCL3	transcription regulator	Inhibited	-2.219	4.01e-06			GATA3,ID2,IFNG,IL13,IL4
TRAIP	enzyme			4.56e-06	0.000698	C5,IL13,IL4	C5,IFNG,IL13,IL4
TP53	transcription regulator	Inhibited	-2.183		5.9e-06	APP,AR,CDH3,CITED2,CSF1,CTSW,DDR1,F2R,FASLG,H19,HBEGF,ID2,IFI30,IGF2,IL4,LGALS3,Ly6a (includes others),OAS1,PCDH7,PERP,PLK2,RNF144B,ROBO1,S100A4,SH3BGRL2,STEAP3,TIMP2,TLR1,TTC28,VDR
FOXO3	transcription regulator		-0.676	6.1e-06			AR,ATP6V0D2,FASLG,IFNG,IL4,NT5E,PDE3B,RBL2
LTC4S	enzyme			6.24e-06	0.00159	IL13,IL4	IFNG,IL13,IL4
DLL4	other			6.82e-06	0.000931	IL13,IL4,MAF	DTX1,GATA3,IL13,IL4
IL1B	cytokine	Inhibited	-2.551		7.02e-06	ALPL,APP,CCR2,CCR5,CCRL2,CMPK2,CSF1,CXCR3,F2RL1,FASLG,FUT7,H19,HBEGF,IL18R1,IL18RAP,KLRB1,NOS1,PCDH7,RORA,RXRA,TIMP2,VDR
CD86	transmembrane receptor		-1.961	7.07e-06	0.000791	FASLG,HOMER2,ICOS,IL4	FASLG,HOMER2,ICOS,IFNG,IL4
AG490	chemical - kinase inhibitor		1.664	8.08e-06			BMP7,CYSLTR2,ICOS,IFNG,IGF2,IL4
RC3H1	enzyme			8.22e-06	0.00106	ICOS,IL13,IL4	ICOS,IFNG,IL13,IL4
phorbol myristate acetate	chemical drug	Inhibited	-2.684	8.26e-06	2.14e-05	APP,C5,CAPG,CCR2,CSF1,FASLG,FCER1G,FFAR2,H19,HBEGF,ICOS,ID2,IGF2,IL13,IL4,MAF,OAS1,PDE3B,PTPRB,RXRA,SETBP1,TLR1,TNFSF14,VDR	BMP7,C5,FASLG,GATA3,H19,ICOS,ID2,IFNG,IGF2,IL13,IL4,IL7R,ITGB3,PDE3B,PRKX,PTPRB,TBX21,TNFSF14,XCL1
RGS10	other			8.71e-06			CCR4,CXCR3,IFNG,IL13,IL4
ICOSLG/LOC102723996	other			9.83e-06	0.00121	ICOS,IL13,IL4	ICOS,IFNG,IL13,IL4
VIPR2	g-protein coupled receptor			9.94e-06	3.71e-05	FASLG,IL4,MAF	FASLG,IFNG,IL4
IL13	cytokine		-1.507	1.13e-05	0.000582	CCR5,CHN2,GPNMB,HOMER2,IL13,IL4,MAF,PDGFC,RIN2,TIMP2,TLR1	CHN2,CHST2,EPAS1,GATA3,GPNMB,HOMER2,IFNG,IL13,IL17RB,IL4,ST3GAL6
prostaglandin E2	chemical - endogenous mammalian		0.712	4.44e-05	1.15e-05	APP,B3GALT5,CCR5,CSF1,CST7,CXCR3,F2R,F2RL1,FASLG,GCNT1,PLK2,TNFSF14	B3GALT5,CCR4,CXCR3,FASLG,IFNG,IL7R,NT5E,TBX21,TNFSF14
CXCL10	cytokine			1.16e-05	0.00136	CXCR3,IL13,IL4	CXCR3,IFNG,IL13,IL4
PDCD1	phosphatase		-0.392	1.17e-05	0.00116	CST7,HRH4,IL13,IL4	HRH4,IFNG,IL13,IL4,PRKD3
GLI1	transcription regulator	Inhibited	-2.183		1.19e-05	CMPK2,CSF1,FASLG,ID2,IGF2,MAN1C1,PDZRN3,RXRA,SOX5,SYNE1
IL7	cytokine	Inhibited	-2.007	1.26e-05	2.8e-05	CSF1,ICOS,IL13,IL18R1,IL18RAP,IL4,Ly6a (includes others),MAF	GATA3,ICOS,IFNG,IL13,IL18R1,IL4,IL7R
bleomycin	chemical drug	Inhibited	-2.946		1.27e-05	CCR2,CCR5,F2R,FASLG,HBEGF,IL13,IL4,S100A4,TIMP2
TLR4	transmembrane receptor		-1.779		1.27e-05	APP,CCR5,CD38,CITED2,CMPK2,FASLG,HBEGF,HHEX,IL13,IL4,PLK2,RXRA,SMPDL3A
retinol acetate	chemical drug				1.34e-05	ALPL,RARG,RXRA
BCL6	transcription regulator		1.673	1.46e-05	0.000235	FUT7,IL13,IL4,LITAF,Ly6a (includes others),MAF,SOX5	FUT7,GATA3,IFNG,IL13,IL4,IL7R,TBX21
LTB4R2	g-protein coupled receptor			1.48e-05	5.53e-05	AR,IL13,IL4	AR,IL13,IL4
MYDGF	cytokine			1.48e-05	5.53e-05	IL13,IL4,MAF	GATA3,IL13,IL4
CD48	other			1.48e-05			IFNG,IL13,IL4
LEF1	transcription regulator		-0.707	1.55e-05			AR,GATA3,IL13,IL4,IL7R
ERBB2	kinase	Inhibited	-2.534	7.63e-05	1.67e-05	ADAM19,AHNAK,AR,CD9,CDH3,F2R,H19,HBEGF,HOMER2,ID2,IGF2,LGALS3,LITAF,PHLDB1,PTPRB,S100A4,SMTN,VDR	AR,BMP7,CHST2,GATA3,H19,HOMER2,ID2,IFNG,IGF2,ITGB3,PTPRB,RBL2,ST3GAL6
SMARCA4	transcription regulator	Inhibited	-2.121		1.67e-05	AHNAK,ARRDC4,CCR2,CCRL2,CSF1,CXCR3,CXCR6,FFAR2,GPR68,IFI30,LGALS3,PER3,PERP,PHLDB1,SPRY2,TIMP2,TRIM36
IgG	complex		0.647		1.79e-05	APP,ARSB,C5,CD9,CSF1,IL13,IL4,LGALS3,Ly6a (includes others)
GLI2	transcription regulator			1.87e-05	0.00165	CCR5,CXCR3,IL13,IL4,VDR	CCR4,CXCR3,GATA3,IFNG,IL13,IL4
cycloheximide	chemical reagent		1.770		1.99e-05	APP,AR,CD38,CITED2,CSF1,FASLG,HBEGF,IGF2,PERP,PTPN13,RARG,RXRA,VDR
IL20	cytokine			2.11e-05			IFNG,IL13,IL4
ZBTB32	transcription regulator			2.11e-05			IFNG,IL13,IL4
NFATC3	transcription regulator			2.19e-05			FASLG,IFNG,IL13,IL4,PRKD3
CCR2	g-protein coupled receptor		-0.277		2.4e-05	APP,CCR2,CCR5,IL13,IL4,TIMP2
NFkB (complex)	complex	Inhibited	-2.575		2.58e-05	APP,CCR2,CSF1,CST7,CXCR3,F2RL1,FAM46A,FASLG,ICOS,IL13,IL4,LITAF,NOS1,PLK2,SOX5,TIMP2,TNFSF14
EP300	transcription regulator			2.62e-05	8.82e-05	AR,CAPG,CD160,CST7,FASLG,ID2,IL18R1,IL18RAP,MAF,NPAS2,NTRK3,OAS3,PERP	AR,CD160,DTX1,EYA2,FASLG,GATA3,ID2,IL18R1,IL7R,NPAS2,PLEKHF1
decitabine	chemical drug		-1.541		2.67e-05	AGRN,B3GALT5,CCR2,CD9,CDH13,CDH3,CXCR3,H19,HBEGF,IPCEF1,LGALS3,MAF,OAS1,ROBO1,TIMP2
fisetin	chemical toxicant		1.000	2.82e-05			FASLG,IFNG,IL13,IL4
IFNB1	cytokine		-0.323	0.000889	2.89e-05	CCR5,CD38,CMPK2,CXCR3,F2R,IL13,IL4,OAS1,SPRY2,TIMP2,VDR	Ctla2a/Ctla2b,CXCR3,IFNG,IL13,IL4,ITGB3,SPRY2
muromonab-CD3	biologic drug			2.89e-05			ICOS,IFNG,IL13
PDCD1LG2	enzyme			2.89e-05			IFNG,IL13,IL4
ZBTB7B	transcription regulator			3.21e-05	0.000177	IL13,IL4,ITGAE,MAF	GATA3,IFNG,IL13,IL4
Cd1	group			3.23e-05			IFNG,IL4
ipilimumab	biologic drug			3.23e-05			ICOS,IFNG
RASAL3	other			3.23e-05			IFNG,IL4
STAT4 dimer	complex			3.23e-05			IFNG,TBX21
ZP3	transporter			3.23e-05			IFNG,IL4
IL10	cytokine		-1.446	3.43e-05	0.000313	CCR2,CCR5,CDH13,CSF1,CXCR3,FASLG,FCER1G,IL13,IL4,ITGAE,MAF	CCR4,CXCR3,FASLG,IFNG,IL13,IL17RB,IL4,IL7R,NT5E,XCL1
IL23A	cytokine		-1.910	3.64e-05			ICOS,IFNG,IL13,IL18R1
CD3E	transmembrane receptor		1.898	3.78e-05			FASLG,ICOS,IFNG,IL13,IL4
IL27RA	transmembrane receptor		-0.390	4.1e-05			IFNG,IL13,IL4,TBX21
NLRP3	other	Inhibited	-2.219	4.37e-05			CXCR3,IFNG,IL13,IL4,TACC2
PTEN	phosphatase		-0.806	4.37e-05			AR,CITED2,CXCR3,DTX1,EPAS1,FASLG,IFNG,IGF2,RBL2,SPRY2,ZBTB16
mifepristone	chemical drug		1.000		4.9e-05	ALPL,CCR2,FASLG,HBEGF,IGF2,IL9R,Ly6a (includes others),PLK2,PTPN5,ROBO1,VDR
isopentenyl diphosphate	chemical - endogenous mammalian			4.97e-05	0.000183	CCR2,CCR5,VDR	CCR4,IFNG,XCL1
CCL19	cytokine			4.97e-05			IFNG,IL13,IL4
CCL21	cytokine			4.97e-05			IFNG,IL13,IL4
IL1RAP	transmembrane receptor			4.97e-05			IL13,IL17RB,IL4
ZFPM1	transcription regulator			4.97e-05			GATA3,IFNG,IL4
HRAS	enzyme				4.99e-05	APP,CAPG,CDH3,CSF1,CXCR3,F2R,FUT7,ID2,IFI30,IGF2,ITGAE,PDGFC,S100A4,SASH1,SOX5,SPRY2
CBFB	transcription regulator		0.186	6.57e-05	5.03e-05	CCR5,CD160,FASLG,IL4,ITGAE,PDE3B	CD160,FASLG,IL4,PDE3B,TBX21
C5	cytokine		-1.982	5.19e-05	0.000566	C5,CSF1,FASLG,IL13,IL18R1,IL4	C5,FASLG,IFNG,IL13,IL18R1,IL4
IL6	cytokine	Inhibited	-2.303	0.00018	5.2e-05	AHNAK,APP,CCR2,CCR5,CD38,CSF1,CXCR3,FASLG,FFAR2,ICOS,ID2,IGF2,IL13,IL4,KLRB1,MAF,RORA,TLR1	CCR4,CXCR3,FASLG,ICOS,ID2,IFNG,IGF2,IL13,IL4,IL7R,ITGB3,KLRB1,RORA
BTNL2	transmembrane receptor		-0.816	0.000898	5.43e-05	ACSBG1,GPR34,IL4,ITGAE,NTRK3,S100A4	ACSBG1,IFNG,IL4,NT5E
ARNT	transcription regulator		-1.165	5.45e-05			CITED2,CXCR3,EPAS1,ERO1A,ID2,ITGB3
lactacystin	chemical - protease inhibitor		-0.029		6.09e-05	APP,CCRL2,CD9,FASLG,IL13,NOS1,PTPN5,SNTB2,VDR
HIF1A	transcription regulator		-1.539	6.11e-05			CITED2,DTX1,EPAS1,ERO1A,FUT7,ID2,IFNG,IGF2,ITGB3,NT5E
concanamycin A	chemical drug			6.3e-05			FASLG,IFNG,IL4
MTA2	transcription regulator			6.3e-05			ID2,IFNG,IL4
PSMB10	peptidase			6.3e-05			GATA3,IL4,TBX21
SLAMF1	transmembrane receptor			6.3e-05			IFNG,IL4,TBX21
TPT1	other			6.3e-05			IL13,IL4,TYRO3
bucladesine	chemical toxicant		-1.327	6.55e-05	0.000412	AR,CCR5,CD38,FASLG,H19,IGF2,IL13,IL4,TIMP2,VDR	AR,CHST2,FASLG,H19,IFNG,IGF2,IL13,IL4,TYRO3
TREM1	transmembrane receptor		-1.000		7.13e-05	ARRDC4,CCRL2,CSF1,FFAR2,HBEGF,IL4,RIN2,SPRY2,TNFSF14
CD38	enzyme	Inhibited	-2.789		7.81e-05	CITED2,CKAP4,ERO1A,IFI30,LGALS3,LMO7,RBPMS,S100A4
tautomycin	chemical - endogenous non-mammalian				7.81e-05	AR,RXRA
HAVCR2	other			7.84e-05	0.000288	CCR5,IL13,IL4	IFNG,IL13,IL4
ITGAL	transmembrane receptor			7.84e-05			GATA3,IL13,IL4
TRAF3IP2	other		-1.945	7.87e-05			GATA3,IFNG,IL13,IL4
ELAVL1	other			8.45e-05			GATA3,HOMER2,IL13,IL4,PCGF2
Histone h3	group			8.63e-05			FASLG,GATA3,GRIK5,ID2,IFNG,IL13,IL4,TACC2,TBX21,TSHZ3
NFATC1	transcription regulator		-1.935	8.98e-05			FASLG,IFNG,IL4,ITGB3,TBX21
camptothecin	chemical drug		-1.230		9.12e-05	AR,CCRL2,CSF1,F2RL1,FASLG,GPNMB,HBEGF,IL18R1,IL9R,LGALS3,LITAF,PERP,SNTB2,SPRY2,SYNE1,TGM3
IKZF1	transcription regulator			9.42e-05			DTX1,IFNG,IL18R1,IL7R,KIAA1211L,TBX21
IL33	cytokine	Inhibited	-2.114	9.54e-05			GATA3,IFNG,IL13,IL17RB,IL4
CD2	transmembrane receptor		-1.041	9.56e-05			FASLG,IFNG,IL13,IL4
IL1RL1	transmembrane receptor			9.61e-05	0.000352	IL13,IL4,TLR1	IFNG,IL13,IL4
MOG	other		-1.109	0.000221	9.61e-05	C5,CCR2,CCR5,IL13,IL4	C5,IFNG,IL13,IL4
CABIN1	other			9.61e-05			IFNG,IL13,IL4
HRH2	g-protein coupled receptor			9.61e-05			IFNG,IL13,IL4
TNFRSF6B	transmembrane receptor			9.61e-05			FASLG,IFNG,IL4
TNFSF4	cytokine			9.61e-05			IFNG,IL13,IL4
LOC290071	other			9.65e-05	0.000233	IL13,IL4	IL13,IL4
LY9	other			9.65e-05	0.000233	IL4,ZBTB16	IL4,ZBTB16
STARD7	other			9.65e-05	0.000233	IL13,IL4	IL13,IL4
Zfp35	other			9.65e-05	0.000233	IL13,IL4	IL13,IL4
SLC7A5	transporter			9.65e-05			IFNG,IL4
TRD	other			9.65e-05			IFNG,NT5E
LYN	kinase		1.446	0.000101	0.00077	C5,CSF1,IL13,IL4,KLRB1	C5,IFNG,IL13,IL4,KLRB1
C5AR1	g-protein coupled receptor	Inhibited	-2.000	0.000105	0.000563	C5,FCER1G,IL13,IL4	C5,IFNG,IL13,IL4
PIK3CG	kinase		-0.293	0.000105			ATP6V0D2,IFNG,IL4,ITGB3
ITGB2	transmembrane receptor		-1.969	0.000115			GATA3,IFNG,IL4,TBX21
KLRC4-KLRK1/KLRK1	transmembrane receptor			0.000116	0.000425	FASLG,IL13,RXRA	FASLG,IFNG,IL13
CFLAR	other			0.000116			GATA3,IFNG,IL4
IGHE	other			0.000116			IL13,IL4,TYRO3
IL19	cytokine			0.000116			IFNG,IL13,IL4
S1PR1	g-protein coupled receptor			0.000116			GATA3,IFNG,IL4
E. coli B5 lipopolysaccharide	chemical - endogenous non-mammalian	Inhibited	-2.339	0.00012	0.000512	ADH1C,CCR5,CXCR3,CXCR6,IL13,IL18RAP,IL4,IL9R,TIRAP	CCR4,CXCR3,CXCR6,IL13,IL4,IL7R,PRDM16,XCL1
F2RL1	g-protein coupled receptor				0.000126	F2RL1,HBEGF,IL13,IL4,RARG
MGAT5	enzyme			0.000139			IFNG,IL13,IL4
PAEP	other			0.000139			CXCR3,GATA3,IFNG
tretinoin	chemical - endogenous mammalian	Inhibited	-3.965		0.000141	AHNAK,ALPL,APP,B3GALT5,CCR5,CCRL2,CD38,CHN2,CITED2,FCER1G,FFAR2,HBEGF,ID2,IGF2,ITGAE,Ly6a (includes others),NTRK3,OAS1,OAS3,PLK2,RARG,RXRA,SNX8,SOX5,VDR,ZBTB16,ZNF536
buthionine sulfoximine	chemical drug				0.000142	CCR2,CCR5,HBEGF
CSF1	cytokine		-1.463		0.000142	CCR5,CSF1,F2R,F2RL1,FASLG,FCER1G,GPR68,TLR1
EBI3	cytokine		-1.282	0.000149			IFNG,IL13,IL4,TBX21
PRL	cytokine	Inhibited	-2.985		0.000151	APP,CMPK2,GPNMB,ID2,IGF2,MAGED1,OAS1,OAS3,TIMP2,VDR
EGR1	transcription regulator	Inhibited	-2.407		0.000154	AR,CCR2,CSF1,FASLG,IGF2,IL13,IL4,PDGFC
LGALS9	other			0.000164	0.000597	CCR5,IL13,IL4	IFNG,IL13,IL4
naltrexone	chemical drug			0.000164	0.000597	FASLG,IL4,NTRK3	FASLG,IFNG,IL4
GATA1	transcription regulator		-1.982	0.000173			ABCA2,GATA3,IL13,IL4,IL7R,ITGB3,ST3GAL6
uric acid	chemical - endogenous mammalian	Inhibited	-2.200	0.000175			IFNG,IL13,IL4,ITGB3,TACC2
C3	peptidase		-0.905	0.000361	0.000176	APP,C5,CSF1,IL13,IL4	C5,IFNG,IL13,IL4
DNASE2	enzyme				0.000177	GPNMB,Ly6a (includes others),OAS1,OAS3
leupeptin	chemical - protease inhibitor				0.000183	APP,CD9,IGF2
Interferon alpha	group	Inhibited	-2.392	0.000185	0.000306	CCR5,CD38,CXCR3,FASLG,IL13,IL18R1,IL18RAP,OAS1,SPRY2,TLR1,TTC28	CXCR3,FASLG,GATA3,IFNG,IL13,IL18R1,NT5E,SPRY2,TBX21
FYN	kinase		-1.698	0.00019	0.001	IL13,IL4,PTPN5,RORA	IL13,IL4,PTPN5,RORA
CMIP	other			0.000192	0.000463	IL4,MAF	IFNG,IL4
Gzmb	peptidase			0.000192	0.000463	IL13,IL4	IL13,IL4
ramatroban	chemical drug			0.000192	0.000463	IL13,IL4	IL13,IL4
CADM1	other			0.000192			IFNG,IL4
ganglioside GQ1B	chemical - endogenous mammalian			0.000192			IFNG,IL4
IL20RB	other			0.000192			IFNG,IL4
TPP2	peptidase			0.000192			IFNG,TBX21
GFI1	transcription regulator		1.922	0.000194	0.00143	CSF1,F2R,ID2,TNFSF14,VDR	GATA3,ID2,IL7R,NT5E,TNFSF14
PI3K (complex)	complex		-1.664	0.000204			FASLG,FUT7,GATA3,H19,IFNG,IGF2,IL7R,RBL2
TNFRSF8	transmembrane receptor		-0.625	0.00041	0.000206	AHNAK,FASLG,IL13,IL4,PCDH7	FASLG,IFNG,IL13,IL4
CRH	cytokine				0.000206	AR,FASLG,IL4,NOS1,VDR
aspirin	chemical drug		1.969	0.000215			AR,FASLG,IFNG,IL4,XCL1
CD44	enzyme	Inhibited	-2.630		0.000218	ABCA2,CCR2,CCR5,CELA1,CXCR3,FASLG,LGALS3,Ly6a (includes others)
cigarette smoke	chemical toxicant		-1.931	0.000219			EPAS1,GATA3,H19,IFNG,IL13,IL4,PTPRB
EGLN1	enzyme		-0.508	0.000221			EPAS1,FASLG,IFNG,IL4
MAPKAPK2	kinase	Inhibited	-2.000	0.000221			CITED2,IL13,IL4,LMO4
calcitriol	chemical drug		-0.364	0.00122	0.000223	ADAM19,APP,AR,CSF1,HBEGF,ID2,IL4,Ly6a (includes others),MAF,RBPMS,RXRA,SPRY2,VDR	AR,BMP7,GATA3,ID2,IFNG,IL4,RNF144A,SPRY2,TBX21
CD274	enzyme			0.000224			IFNG,IL13,IL4
NTN1	other			0.000224			IFNG,IL13,IL4
TSC2	other	Activated	2.236	0.000225	0.00165	ERO1A,GPNMB,LGALS3,NTRK3,SMPDL3A	ERO1A,GPNMB,IFNG,LOC728392,SMPDL3A
TLR2	transmembrane receptor		-1.107	0.000232	0.000406	APP,CCR2,CCR5,FASLG,IL13,IL4,VDR	FASLG,GATA3,IFNG,IL13,IL4,TBX21
cardiotoxin	chemical - other		-1.982	0.000232			DOK2,FASLG,H19,IGF2,IL7R,TSHZ3
HPRT1	enzyme				0.000233	IL4,P2RY1
TCF3	transcription regulator		-1.000	0.000246			DTX1,GATA3,ICOS,ID2,IL7R,LMO4,RORA
LTB	cytokine			0.000258			IFNG,IL4,Klra7 (includes others)
TLR6	transmembrane receptor			0.000258			IFNG,IL13,IL4
alefacept	biologic drug	Activated	2.000	0.000275			HOPX,IFNG,IL7R,KLRB1
SMAD3	transcription regulator		1.383	0.000275			ABI2,GATA3,ID2,IFNG,IL13,IL4,TBX21
NCSTN	peptidase		1.000		0.000282	APP,FCER1G,Ly6a (includes others),NCF4
CARD11	kinase			0.000295			IFNG,IL13,IL4
NFIL3	transcription regulator			0.000295			ID2,IFNG,IL13
TNFRSF4	transmembrane receptor			0.000295			IFNG,IL13,IL4
CCR5	g-protein coupled receptor		-0.225	0.00122	0.000314	CCR5,CD9,FASLG,IL4	FASLG,IFNG,IL4
DEFB4A/DEFB4B	other			0.000319	0.000767	IL13,IL4	IL13,IL4
6-formylindolo[3,2-b]carbazole	chemical reagent			0.000319			GATA3,IL13
ganglioside GD1b	chemical - endogenous mammalian			0.000319			IFNG,IL4
HRSP12	enzyme			0.000319			IFNG,IL4
LAMP1	other			0.000319			IFNG,TBX21
ranitidine	chemical drug			0.000319			IFNG,IL4
terfenadine	chemical drug			0.000319			IFNG,IL4
Trbv13-1	other			0.000319			IFNG,IL4
PPP3CA	phosphatase				0.000321	APP,CD9,FASLG,LITAF,S100A4
HSPD1	enzyme			0.000336			GATA3,IFNG,TBX21
LAT	kinase				0.000352	CSF1,IL13,IL4
CTNNB1	transcription regulator	Inhibited	-2.607	0.00171	0.000357	AGRN,APP,AR,F2R,FASLG,FCER1G,HHEX,ID2,IGF2,IL13,IL4,LGALS3,QPCT,S100A4,SOX5,TDGF1	AR,BMP7,DTX1,EYA2,FASLG,GATA3,ID2,IGF2,IL13,IL4,QPCT
Tgf beta	group		-1.698	0.000369	0.00109	ADH1C,CCR2,CSF1,IL13,IL4,MAF,RORA,TIMP2	GATA3,IFNG,IL13,IL4,ITGB3,RORA,TBX21
resiquimod	chemical drug		0.603	0.000374			DENND4C,GATA3,IFNG,IL13,IL4,TBX21
BATF	transcription regulator			0.00038	0.00136	IL13,IL4,RORA	IL13,IL4,RORA
ELF1	transcription regulator			0.00038	0.00136	CITED2,FCER1G,IL4	CITED2,IFNG,IL4
TRA	transmembrane receptor			0.00038	0.00136	CXCR3,IL4,ITGAE	CXCR3,IFNG,IL4
hemocyanin	biologic drug			0.00038			IFNG,IL13,IL4
Smad	complex			0.00038			ID2,IFNG,TBX21
IL10RA	transmembrane receptor		-1.177	0.000397	0.000444	ADH1C,CELA1,CST7,ERO1A,FASLG,Ly6a (includes others),PDE2A,STARD8,TGM3,VSIG2	Art2b,ERO1A,FASLG,IFNG,LMO4,PDE2A,ST3GAL6,TGM3
PRKAA2	kinase		0.277	0.000406			ACOT7,GATA3,LMO4,PRDM16,ZNF462
clozapine	chemical drug			0.00041			GATA3,IL4,PRDM16,TBX21
Hbb-b2	other	Inhibited	-2.000		0.000425	CCR2,CCR5,CXCR3,CXCR6
FAS	transmembrane receptor				0.000456	CCRL2,CSF1,CXCR3,F2RL1,FASLG,GPNMB,IL18R1,IL9R,LGALS3,SNTB2,TGM3
IKBKB	kinase	Inhibited	-2.157		0.000458	CDH13,CSF1,FASLG,IL13,IL4,PCDH7,PTPN13,S100A4,TIMP2
MAPK14	kinase	Inhibited	-2.121	0.000466			FASLG,IFNG,IGF2,IL13,IL4,TBX21
tamoxifen	chemical drug	Activated	2.121		0.000471	AHNAK,F2R,FASLG,H19,IGF2,INPPL1,NOS1,SYNE1,VDR
Cxcl9	cytokine			0.000477			IFNG,IL4
DUSP10	phosphatase			0.000477			IFNG,IL4
IL12RB1	transmembrane receptor			0.000477			IFNG,IL4
P glycoprotein	group			0.000477			IFNG,IL4
penicillamine	chemical drug			0.000477			IFNG,IL4
proteoglycan	chemical - other			0.000477			IFNG,IL4
Trbv13-2	other			0.000477			IFNG,IL4
UBASH3A	enzyme			0.000477			IFNG,IL4
CCR1	g-protein coupled receptor			0.00048			ATP6V0D2,IFNG,ITGB3
prostaglandin D2	chemical - endogenous mammalian			0.00048			IFNG,IL13,IL4
PTPRC	phosphatase			0.00048			CXCR3,FASLG,IFNG
LY294002	chemical - kinase inhibitor	Activated	2.003		0.000488	ADH1C,AR,CCR2,CD38,F2R,HBEGF,IGF2,MAF,NTRK3,PLK2,SNTB2,SPRY2,ZBTB16
RET	kinase				0.000492	CSF1,IL13,MAF,NOS1,PER3,PTPN13
SPI1	transcription regulator		-1.260	0.00116	0.000503	CSF1,FCER1G,FUT7,ID2,IL13,IL4,Klra7 (includes others),NCF4	FUT7,ID2,IL13,IL4,IL7R,Klra7 (includes others)
NFKBIA	transcription regulator		0.563		0.00051	CDH13,CDH3,CSF1,ERO1A,FASLG,IGF2,IL13,LITAF,PCDH7,PTPN13,TIMP2,TNFSF14
N-formyl-Met-Leu-Phe	chemical reagent			0.00177	0.000514	CAPG,CCR5,IL13,IL4	IL13,IL4,TYRO3
EOMES	transcription regulator		-1.960	0.000523			CAP2,FASLG,IFNG,Klra7 (includes others)
PLA2G10	enzyme		-1.000	0.000523			FASLG,GATA3,IL13,IL4
WAS	other			0.000535	0.0019	IL4,ITGAE,TLR1	CCR4,IFNG,IL4
JAG1	growth factor			0.000535			IFNG,IL13,ITGB3
titanium dioxide	chemical drug			0.000535			FASLG,IFNG,IL13
TNFSF15	cytokine			0.000535			IFNG,IL13,IL4
mir-21	microrna		1.054	0.00055			CD226,FASLG,IFNG,IL4,NPAS2,SPRY2,TBX21
RELB	transcription regulator			0.000554			IFNG,IL4,TBX21,TNFSF14
B2M	transmembrane receptor			0.000594			IFNG,IL4,Klra7 (includes others)
TNFSF11	cytokine	Inhibited	-2.577	0.000605			ATP6V0D2,CCR4,DOK2,GPR68,IFNG,IL13,ITGB3
lovastatin	chemical drug		0.398	0.000607			AR,GATA3,IFNG,IL4,TBX21
Hbb-b1	transporter	Inhibited	-2.000		0.000615	CCR2,CCR5,CXCR3,CXCR6
hydrogen peroxide	chemical - endogenous mammalian	Inhibited	-2.489		0.000623	APP,CCR2,CCR5,CDH13,CSF1,F2RL1,FASLG,HBEGF,IL13,IL4,NOS1,VDR
RARA	ligand-dependent nuclear receptor		-0.659		0.000637	ADH1C,C5,CD38,FASLG,IL13,IL4,OAS1,PHLDB1,RARG
APP	other	Inhibited	-2.905	0.00124	0.000639	APP,CCR5,CDH3,CITED2,CMPK2,CSF1,EFHC2,F2RL1,FASLG,H19,IGF2,IL4,LGALS3,Ly6a (includes others),MAF,NOS1,PTPN5,RNF144B	CITED2,Ctla2a/Ctla2b,DPY19L3,EFHC2,EPAS1,FASLG,H19,IFNG,IGF2,IL4,ITGB3,LMO4,PTPN5
PGR	ligand-dependent nuclear receptor		-0.792		0.000655	AR,CKAP4,F2RL1,H19,HBEGF,PLK2,SNTB2,SPRY2,VDR
AXL	kinase			0.000657			IFNG,IL13,IL4
KRT17	other			0.000657			CCR4,IL13,IL4
androstenedione	chemical - endogenous mammalian			0.000665	0.00159	AR,FASLG	AR,FASLG
CXCL16	cytokine			0.000665	0.00159	CD38,IL4	IFNG,IL4
IC87114	chemical - kinase inhibitor			0.000665	0.00159	IL13,IL4	IL13,IL4
INPPL1	phosphatase			0.000665	0.00159	IL13,IL4	IL13,IL4
TIMD4	other			0.000665	0.00159	IL13,IL4	IL13,IL4
belnacasan	chemical drug			0.000665			IFNG,IL4
ORAI1	ion channel			0.000665			ATP6V0D2,C5
PIM3	kinase			0.000665			IFNG,TBX21
SH3RF1	other			0.000665			IFNG,TBX21
TNFRSF10B	transmembrane receptor			0.000665			IFNG,IL4
TPSD1	peptidase			0.000665			IFNG,IL4
VTCN1	other			0.000665			FASLG,IFNG
CDC73	other				0.000698	APP,H19,IGF2
TGFBR2	kinase		0.861	0.000704			AR,IFNG,KCNJ8,KLRB1,RBL2,TBX21
ABCG1	transporter			0.000725			IFNG,IL13,IL4
IL4R	transmembrane receptor			0.000725			GATA3,IL13,IL4
PLP1	other			0.000725			ICOS,IFNG,IL4
TRAF2	enzyme	Activated	2.219		0.000728	FFAR2,GPR34,IL4,IL9R,LRRC16A
CDH1	other		1.091	0.00073			BMP7,IFNG,IL13,ITGB3
enterotoxin B	biologic drug		-1.938	0.00073			CXCR6,GPNMB,IFNG,IL4
BCR (complex)	complex		0.000	0.000731			CD7,IFNG,IL13,IL4,ZBTB16
FOXO1	transcription regulator		-1.475	0.000759			AR,ATP6V0D2,CITED2,FASLG,IFNG,IL7R,RBL2,TBX21
myristic acid	chemical - endogenous mammalian				0.000767	F2RL1,RXRA
U 50488H	chemical reagent				0.000767	CCR2,CCR5
DNMT1	enzyme		1.192	0.00077			IFNG,IGF2,IL13,IL4
IRF3	transcription regulator	Inhibited	-2.194		0.000793	AHNAK,CCRL2,CMPK2,CXCR3,IL4,OAS1,OAS3
KLF3	transcription regulator		1.938		0.000849	ABHD14B,AHNAK,CAPG,CMPK2,GCNT1,IL4,KLF12,MAGED1,SMPDL3A,TRIM36
TRAF3	other		1.000		0.000861	FFAR2,GPR34,IL4,IL9R,LRRC16A
CAMK4	kinase			0.000873			FASLG,IFNG,IL4
CYP27B1	enzyme			0.000873			CCR4,IFNG,IL4
Cg	complex		0.240	0.000882			AR,EPAS1,FASLG,IFNG,ITGB3,KCNQ5,RORA,SPRY2
abatacept	biologic drug			0.000884			ICOS,IFNG
BCG vaccine	biologic drug			0.000884			IFNG,IL4
CBLB	other			0.000884			IFNG,IL4
CD276	other			0.000884			IFNG,IL4
CRLF2	transmembrane receptor			0.000884			IL13,IL4
enzalutamide	chemical drug			0.000884			AR,HOMER2
HRH3	g-protein coupled receptor			0.000884			CXCR3,IFNG
IL18R1	transmembrane receptor			0.000884			IFNG,IL4
MAP3K2	kinase			0.000884			IFNG,IL4
TNFRSF25	transmembrane receptor			0.000884			IFNG,IL13
CCL2	cytokine		-1.710	0.000898			FASLG,IFNG,IL13,IL4
ADAM10	peptidase				0.000909	APP,CCR2,CSF1,KLRB1,NOS1
RASSF1	other		-1.342		0.000909	HBEGF,LITAF,MTUS1,PCDH7,PLK2
NR4A1	ligand-dependent nuclear receptor		-0.063		0.00091	CSF1,CST7,FASLG,IL13,IL4,ITGAE,RXRA
KMT2D	transcription regulator	Inhibited	-2.646		0.000941	CKAP4,EFHC2,KDELC2,PCDH7,SH3BGRL2,TUSC1,XKRX
PAX3	transcription regulator			0.000949			EYA2,GUCY1A3,ID2,IL7R,PTPN3,TYRO3
APOE	transporter		1.387		0.000949	ABCA2,APP,CCR5,CSF1,F2R,F2RL1,IL4,TNFSF14
MARK2	kinase			0.000953			IFNG,IL4,LMO4
metribolone	chemical reagent	Inhibited	-2.596	0.000974	0.00198	APP,AR,HOMER2,MAF,RAB4A,TIMP2,TRIM36	AR,HOMER2,RAB4A,TACC2,THTPA,TRIM36
