# Supplementary figures and images for: Histone Deacetylase 7 mediates tissue-specific autoimmunity via control of innate effector function in invariant Natural Killer T Cells
Source: eLife journal article supplement (doi:10.7554/elife.32109), 2018-04-16

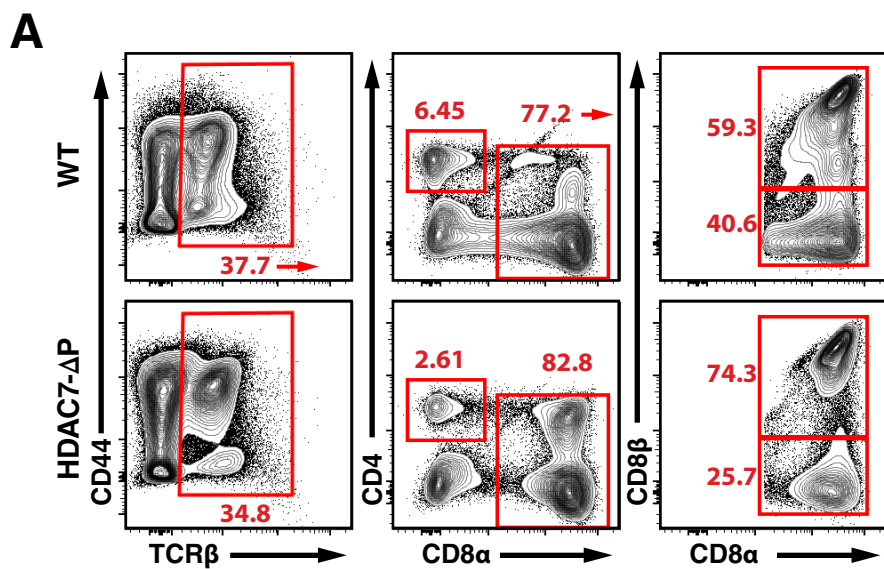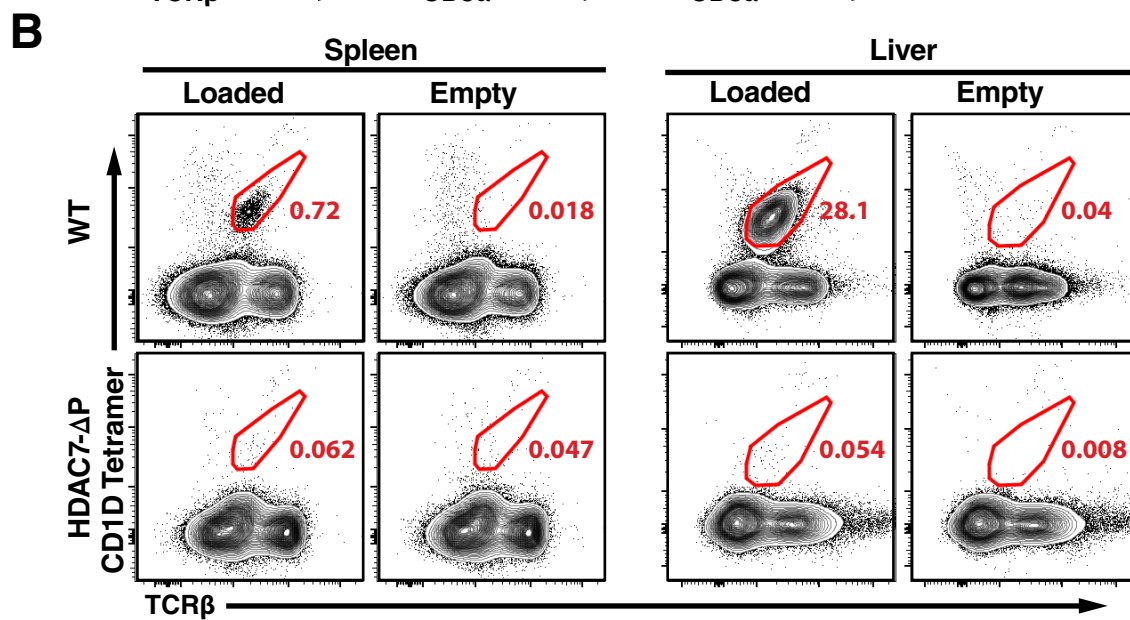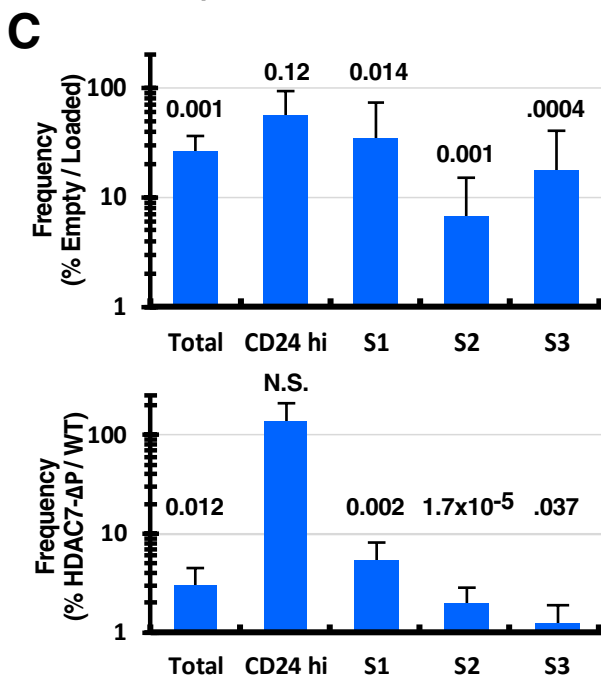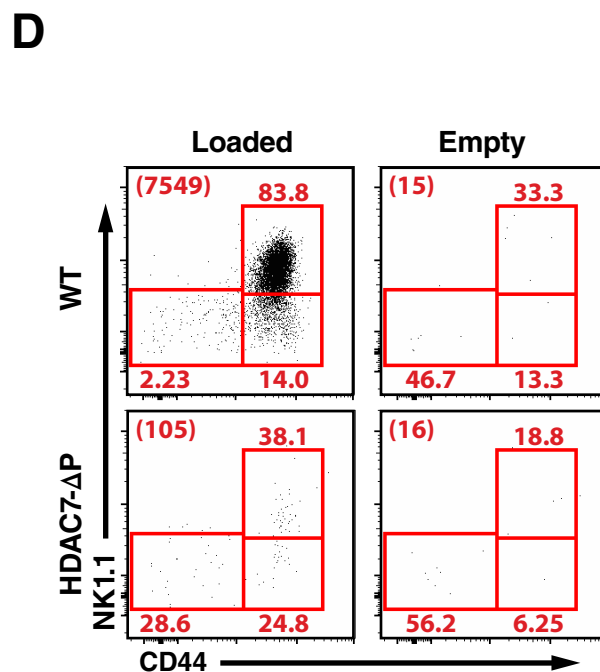

Supplement: supp [file elife-32109-supp-v1.zip]

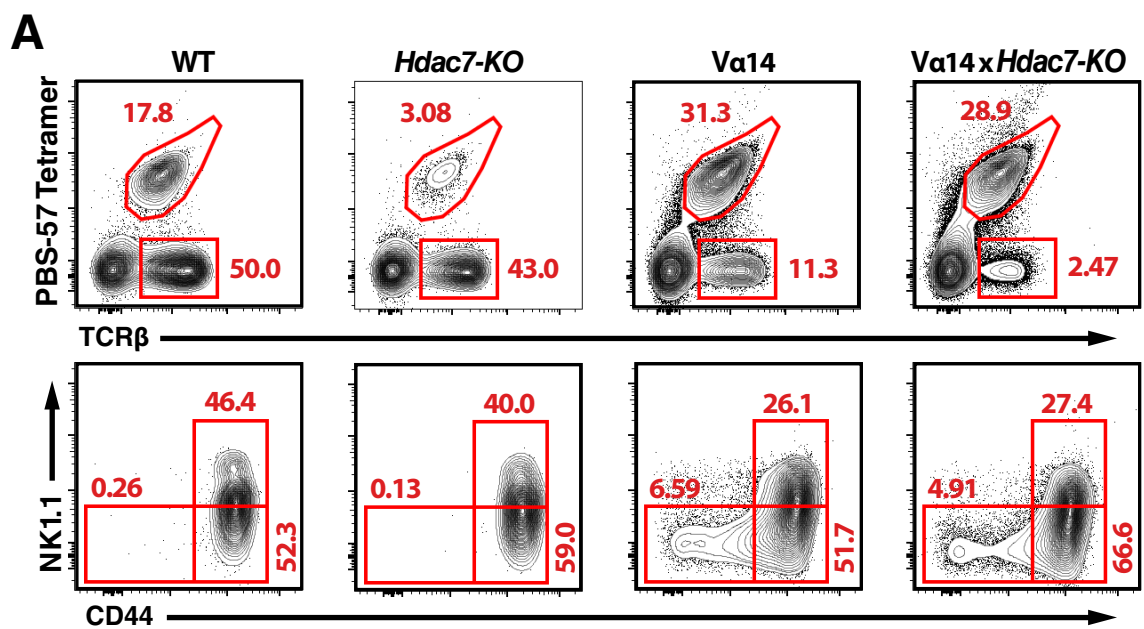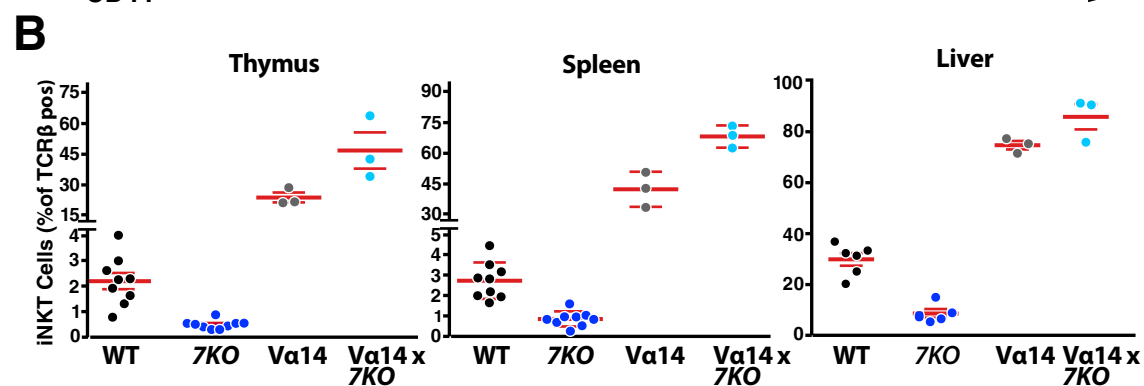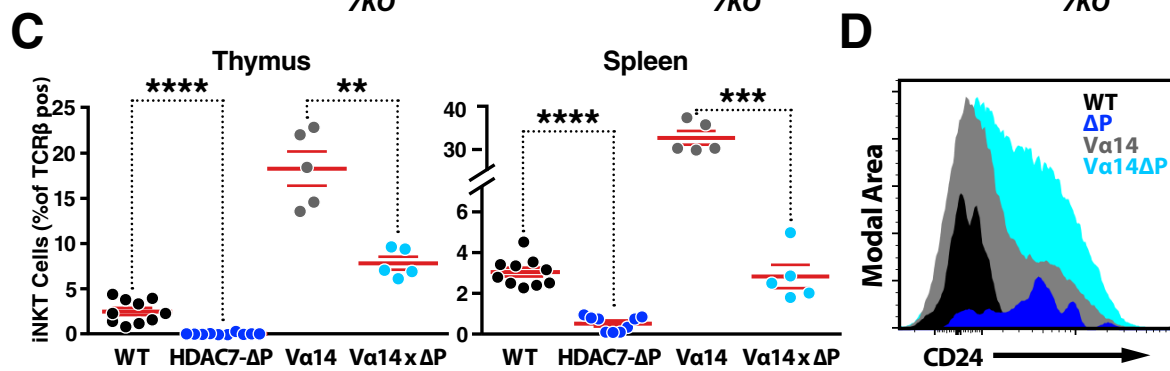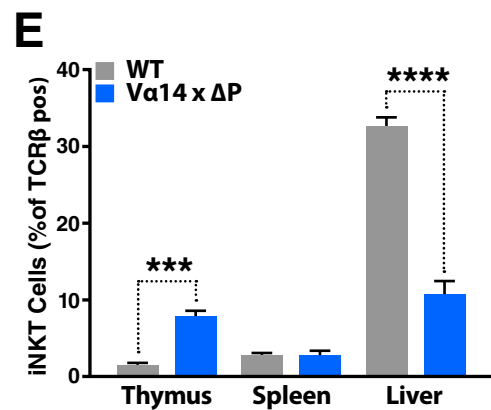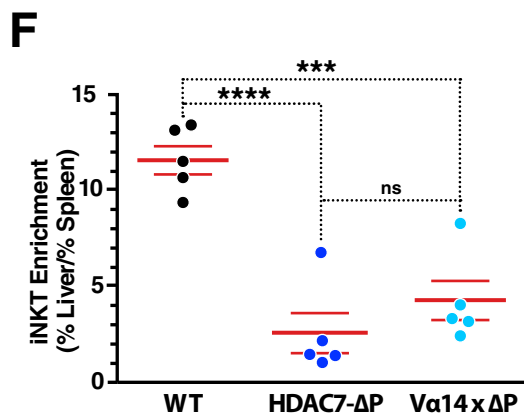

Supplement: supp [file elife-32109-supp-v1.zip]

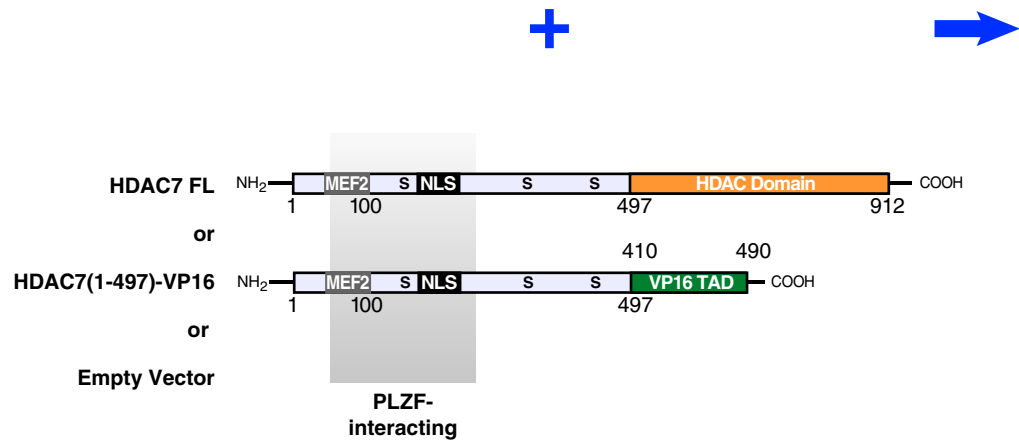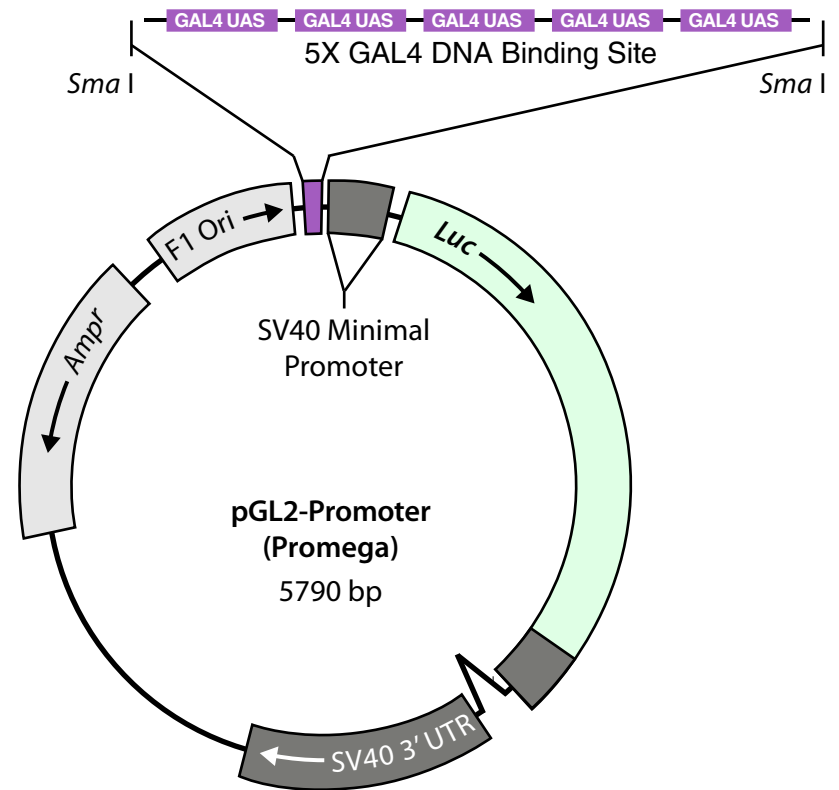

Supplement: supp [file elife-32109-supp-v1.zip]

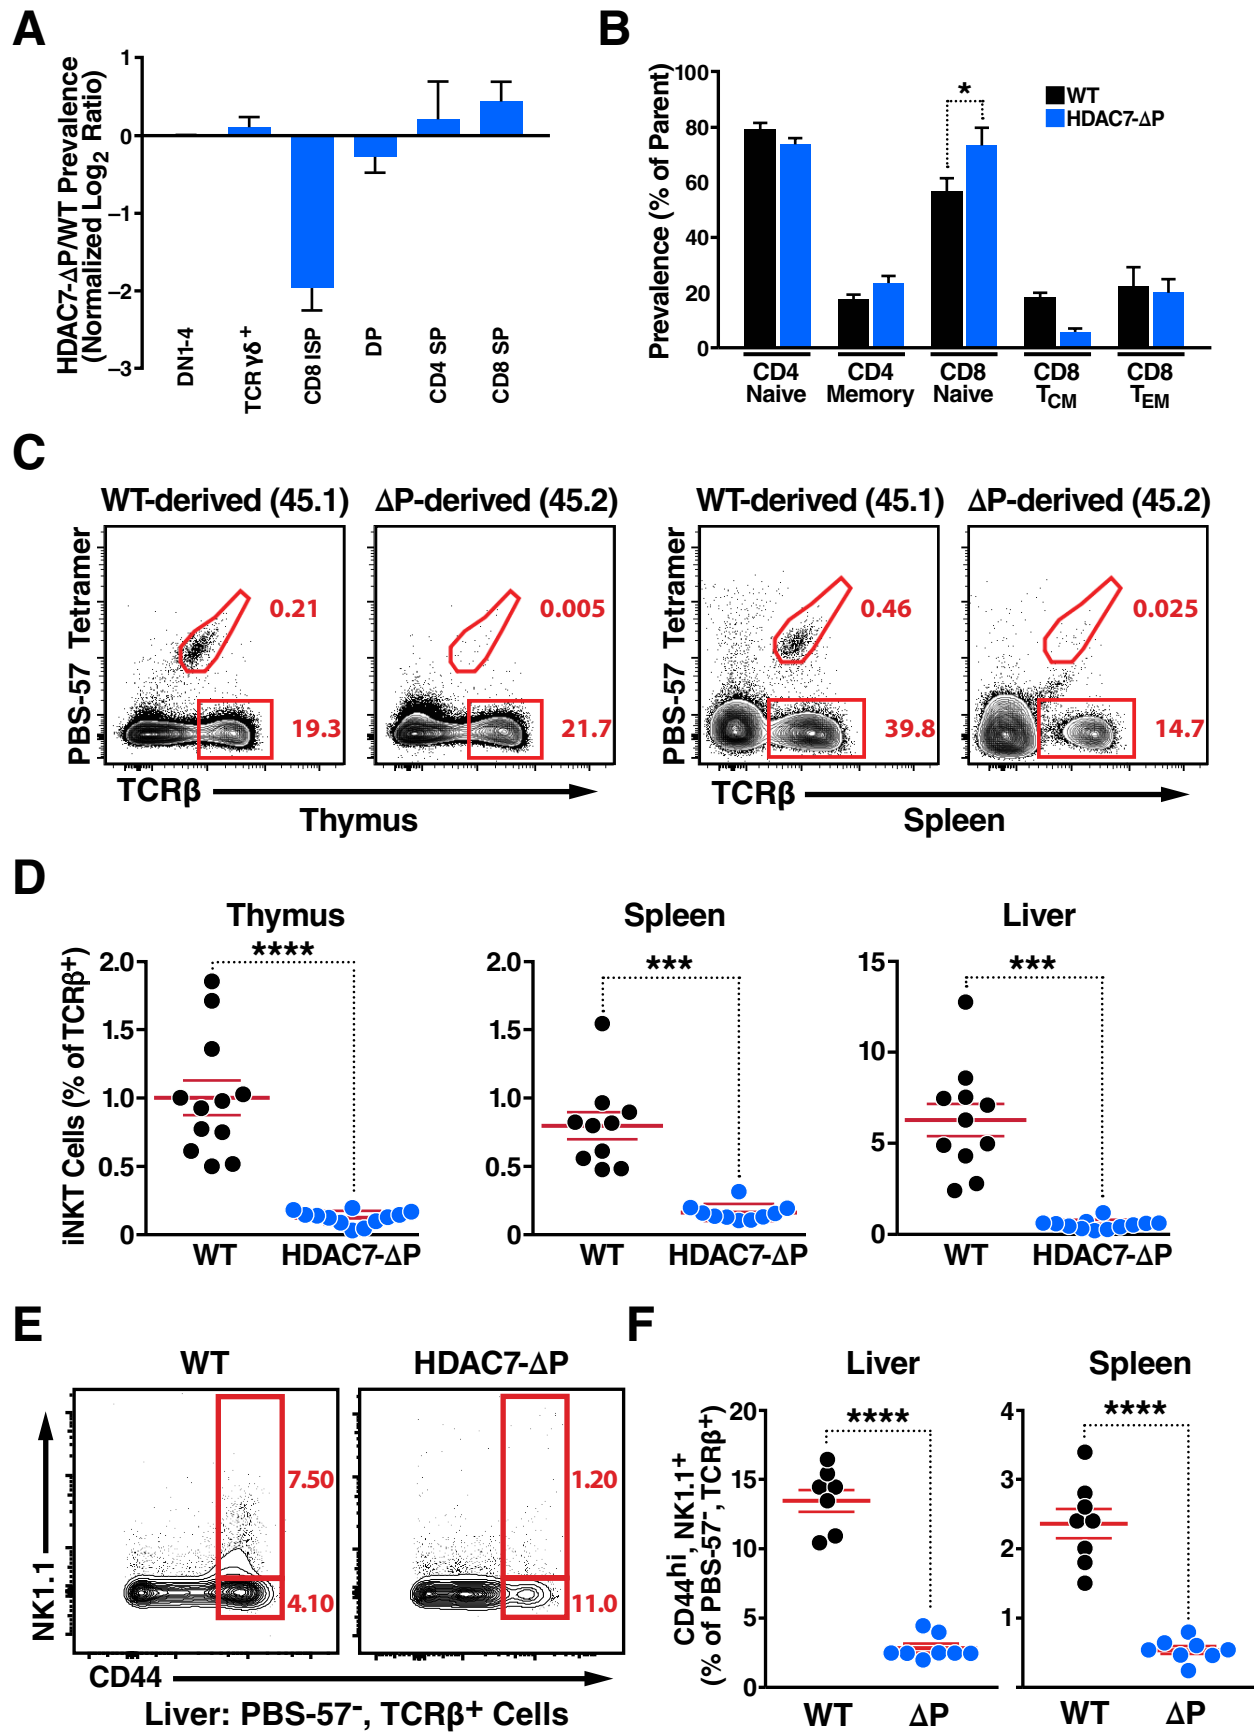

Supplement: supp [file elife-32109-supp-v1.zip]

**A**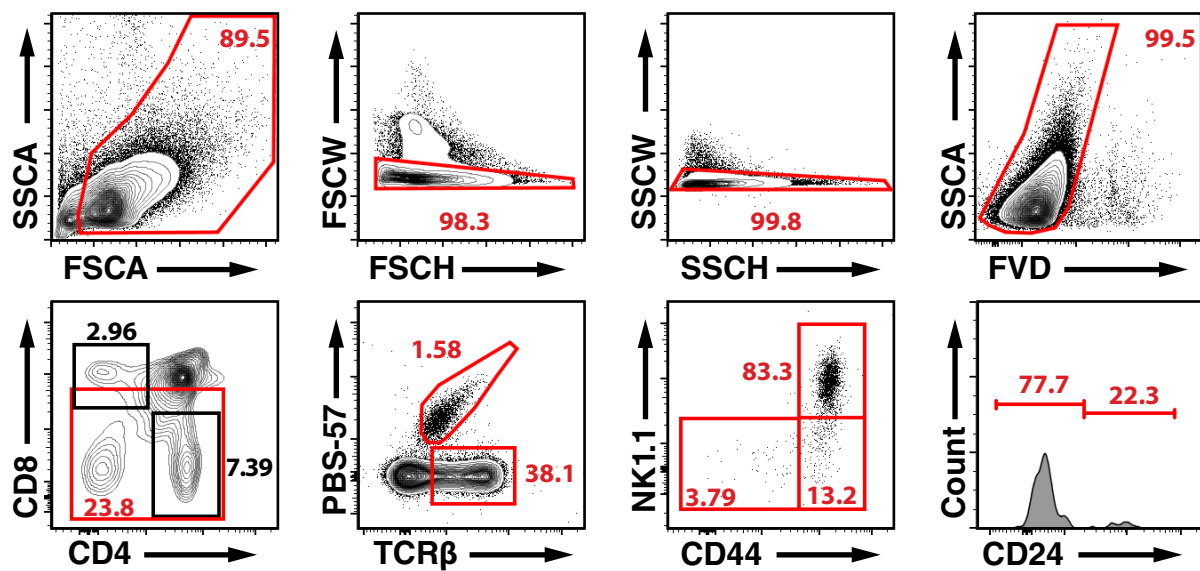**B**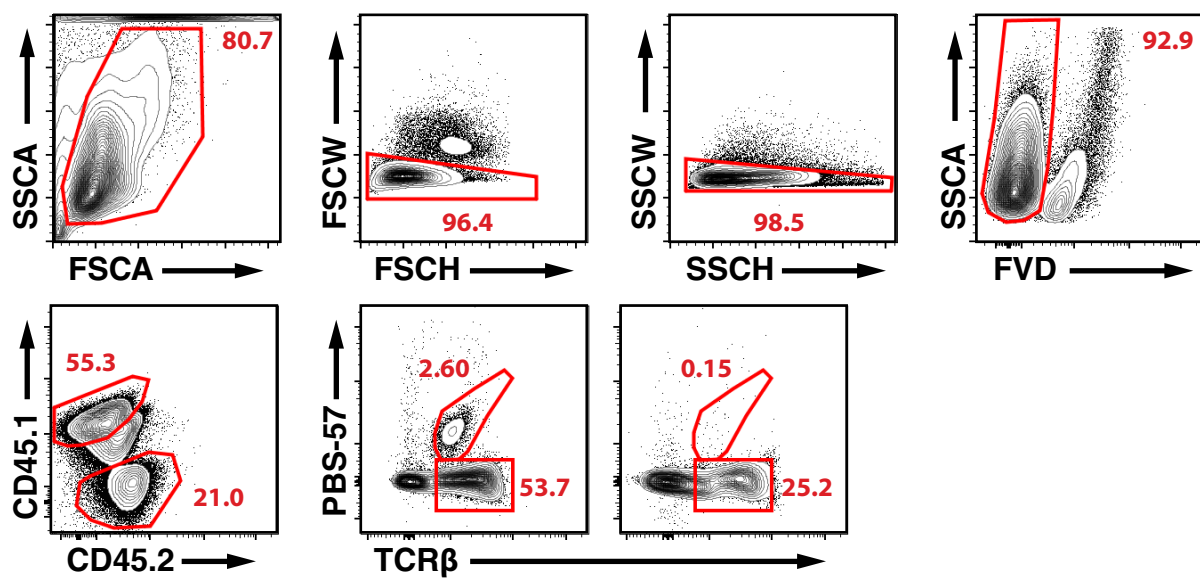

Supplement: supp [file elife-32109-supp-v1.zip]

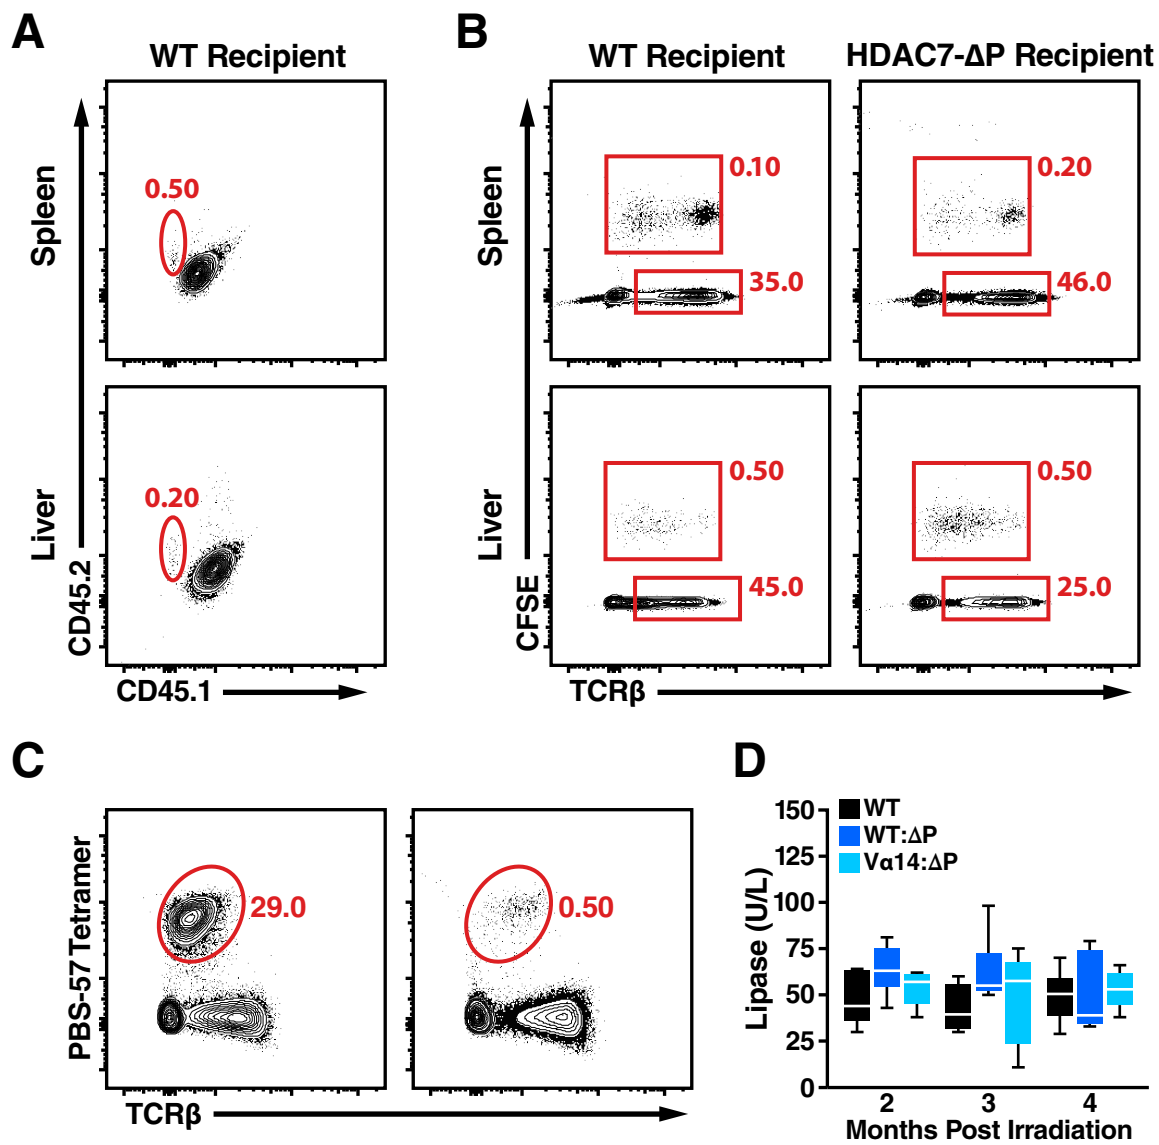

Supplement: supp [file elife-32109-supp-v1.zip]

**A**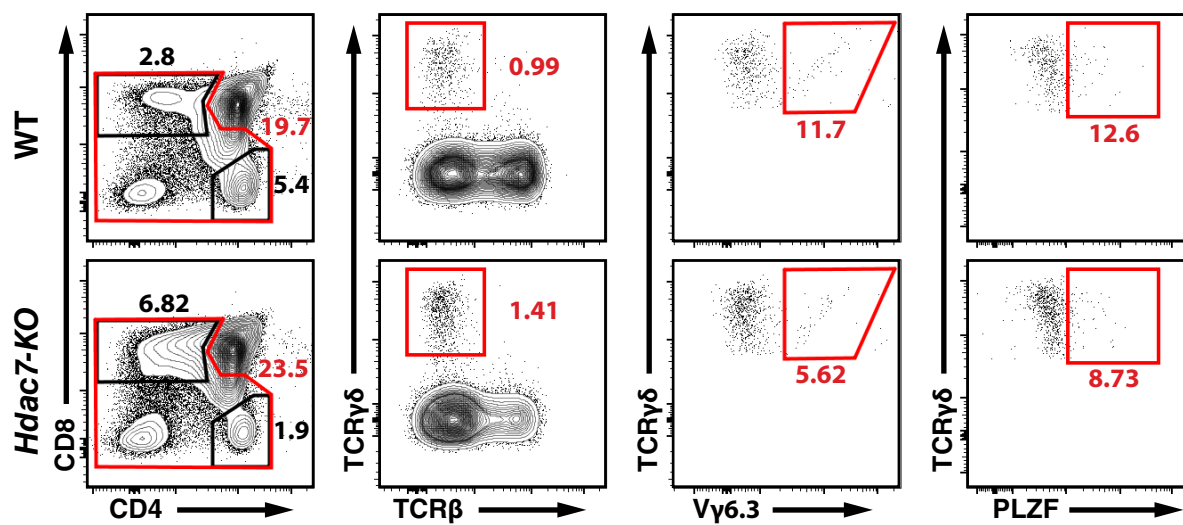**B**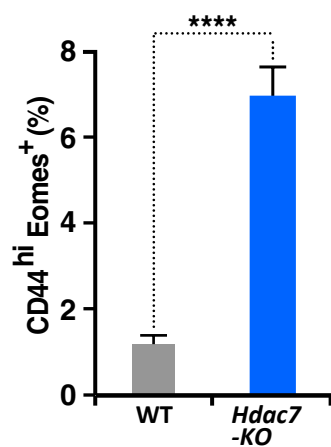**C**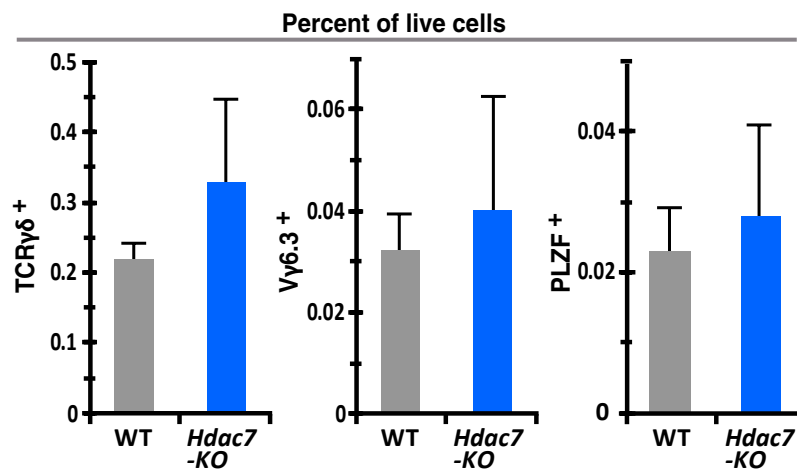**D**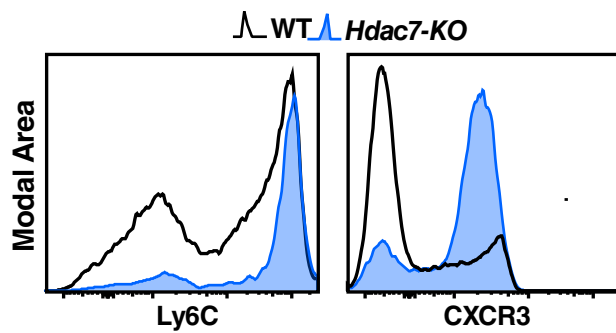

Supplement: supp [file elife-32109-supp-v1.zip]

**A**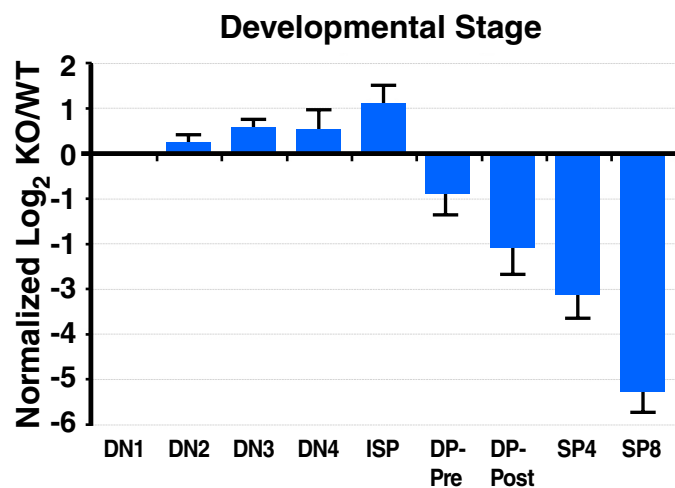**B**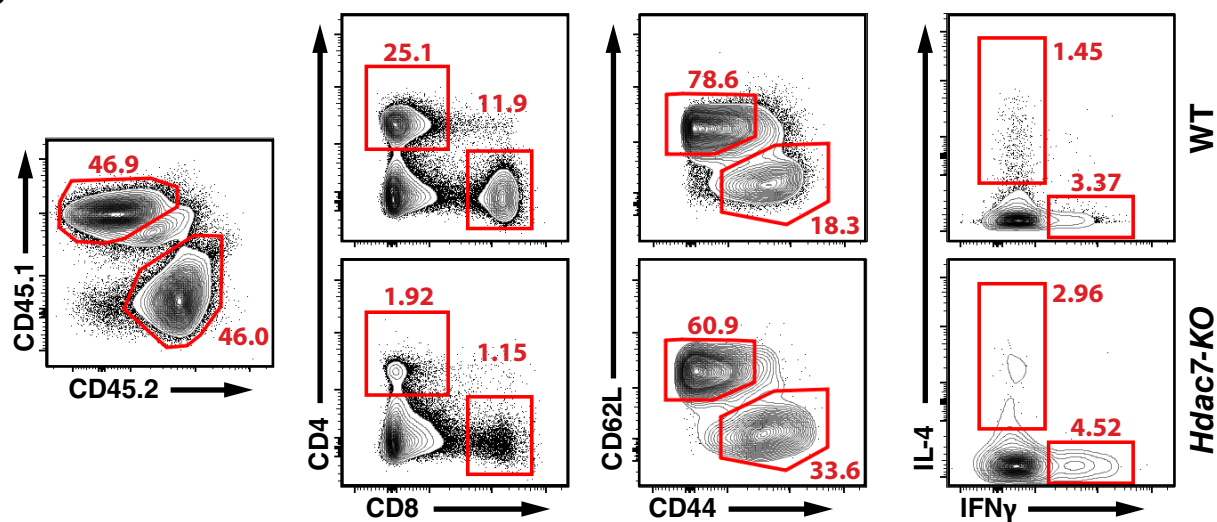**C**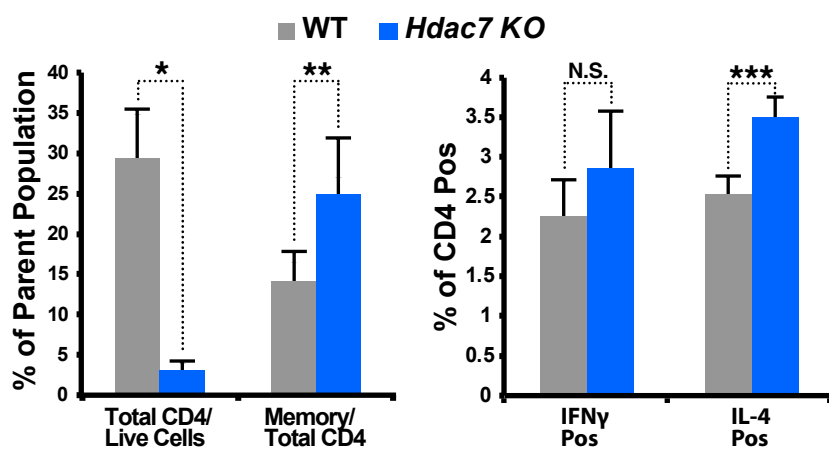

Supplement: supp [file elife-32109-supp-v1.zip]
